1 **USP15 participates in HCV propagation through the regulation of viral RNA translation and lipid**

2 **droplet formation**

3

4 Shinji Kusakabe<sup>1</sup>, Tatsuya Suzuki<sup>1</sup>, Yukari Sugiyama<sup>1</sup>, Saori Haga<sup>1</sup>, Kanako Horike<sup>1</sup>, Makoto Tokunaga<sup>1</sup>,

5 Junki Hirano<sup>1</sup>, Zhang He<sup>1</sup>, David Virya Chen<sup>1</sup>, Hanako Ishiga<sup>1</sup>, Yasumasa Komoda<sup>1</sup>, Chikako Ono<sup>1</sup>, Takasuke

6 Fukuhara<sup>1</sup>, Masahiro Yamamoto<sup>2</sup>, Masahito Ikawa<sup>3</sup>, Takashi Satoh<sup>4</sup>, Shizuo Akira<sup>4</sup>, Tomohisa Tanaka<sup>5</sup>, Kohji

7 Moriishi<sup>5</sup>, Moto Fukai<sup>6</sup>, Akinobu Taketomi<sup>6</sup>, Sachiyo Yoshio<sup>7</sup>, Tatsuya Kanto<sup>7</sup>, Tetsuro Suzuki<sup>8</sup>, Toru

8 Okamoto<sup>1\*</sup> and Yoshiharu Matsuura<sup>1\*</sup>

9

10 <sup>1</sup>Department of Molecular Virology, <sup>2</sup>Department of Immunoparasitology, <sup>3</sup>Department of Experimental

11 Genome Research, and <sup>4</sup>Department of Host Defense, Research Institute for Microbial Diseases, Osaka

12 University, Osaka, <sup>5</sup>Department of Microbiology, Faculty of Medicine, University of Yamanashi, Yamanashi,

13 <sup>6</sup>Department of Gastroenterological Surgery I, Hokkaido University Graduate School of Medicine, Sapporo,

14 <sup>7</sup>The Research Center for Hepatitis and Immunology, National Center for Global Health and Medicine, Chiba,

15 and <sup>8</sup>Department of Virology and Parasitology, Hamamatsu University School of Medicine, Hamamatsu,

16 Japan

17

18

19 \*Corresponding authors

20 Toru Okamoto, PhD

21 Department of Molecular Virology  
22 Research Institute for Microbial Diseases, Osaka University  
23 3-1, Yamada-oka, Suita, Osaka 565-0871, Japan  
24 E-mail: [toru@biken.osaka-u.ac.jp](mailto:toru@biken.osaka-u.ac.jp)  
25 Tel: 81-6-6879-8343  
26 Fax: 81-6-6879-8269

27

28 Yoshiharu Matsuura, DVM, PhD  
29 Department of Molecular Virology  
30 Research Institute for Microbial Diseases, Osaka University  
31 3-1, Yamada-oka, Suita, Osaka 565-0871, Japan  
32 E-mail: [matsuura@biken.osaka-u.ac.jp](mailto:matsuura@biken.osaka-u.ac.jp)  
33 Tel: 81-6-6879-8340  
34 Fax: 81-6-6879-8269

35

36 Running title: USP15 regulates HCV propagation  
37 Keywords: Deubiquitination, HCV, lipid, innate immunity

38

39 **Abstract**

40 Hepatitis C virus (HCV) utilizes cellular factors for an efficient propagation. Ubiquitin is covalently  
41 conjugated to the substrate to alter its stability or to modulate signal transduction. In this study, we examined  
42 the importance of ubiquitination for HCV propagation. We found that inhibition of de-ubiquitinating enzymes  
43 (DUBs) or overexpression of non-specific DUBs impaired HCV replication, suggesting that ubiquitination  
44 regulates HCV replication. To identify specific DUBs involved in HCV propagation, we set up an RNAi  
45 screening against DUBs and successfully identified ubiquitin-specific protease 15 (USP15) as a novel host  
46 factor for HCV propagation. Our studies showed that USP15 is involved in translation of HCV RNA and  
47 production of infectious HCV particles. In addition, deficiency of USP15 in human hepatic cell lines (Huh7  
48 and Hep3B/miR122 cells) but not in a non-hepatic cell line (293T cells) impaired HCV propagation,  
49 suggesting that USP15 participates in HCV propagation through the regulation of hepatocyte-specific  
50 functions. Moreover, we showed that loss of USP15 had no effect on innate immune responses *in vitro* and *in*  
51 *vivo*. We also found that USP15-deficient Huh7 cells showed reductions in the sizes and numbers of lipid  
52 droplets (LDs), and addition of palmitic acids restored the production of infectious HCV particles. Taken  
53 together, these data suggest that USP15 participates in HCV propagation by regulating the translation of HCV  
54 RNA and formation of LDs.

55

## 56 **Importance**

57 Although ubiquitination has been shown to play important roles in the HCV life cycle, the roles of  
58 de-ubiquitinating enzymes (DUBs), which cleave ubiquitin chains from their substrates, in HCV propagation  
59 have not been investigated. Here, we identified USP15 as a DUB regulating HCV propagation. USP15

60 showed no interaction with viral proteins and no participation in innate immune responses. Deficiency of  
61 USP15 in Huh7 cells resulted in suppression of the translation of HCV RNA and reduction in the sizes and  
62 amounts of lipid droplets, and addition of fatty acids partially restored the production of infectious HCV  
63 particles. These data suggest that USP15 participates in HCV propagation in hepatic cells through the  
64 regulation of viral RNA translation and lipid metabolism.

65

## 66 **Introduction**

67 Hepatitis C virus (HCV) belongs to the *Flaviviridae* family and possesses a single-stranded positive-sense  
68 RNA as a genome (1). Viral RNA is translated to a precursor polyprotein which is cleaved into 10 viral  
69 proteins by host and viral proteases. Among the HCV proteins, core, E1 and E2 proteins form viral particles,  
70 and non-structural (NS) 3, 4A, 4B, 5A and 5B proteins are responsible for HCV RNA replication. NS2 protein  
71 cleaves the junction between NS2 and NS3, and p7 has been shown to exhibit ion channel activity (1). HCV  
72 infection leads to chronic infection and eventually induces steatosis, cirrhosis and hepatocellular carcinoma (2).  
73 HCV core protein localizes with many cellular components, such as nucleus, endoplasmic reticulum (ER),  
74 lipid droplets (LDs), lipid rafts and mitochondria (3-7). On the other hand, HCV infection epidemiologically  
75 correlates with extra-hepatic manifestations (EHMs) such as type 2 diabetes, mixed cryoglobulinemia and  
76 non-Hodgkin lymphoma (8). Liver-specific HCV core transgenic (CoreTG) mice develop insulin resistance,  
77 steatosis and hepatocellular carcinoma (9, 10), suggesting that HCV core protein plays a role in liver diseases  
78 and EHMs.

79 Efficient propagation of HCV requires several cellular factors, such as miR-122, a liver-specific microRNA  
80 that binds to two sites of HCV RNA to facilitate HCV replication (11, 12), and protein complexes of molecular  
81 chaperones and co-chaperones such as heat shock proteins, cyclophilin A, FK506-binding protein (FKBP) 8  
82 and FKBP6 (13-15). In addition, phosphatidylinositol-4-kinase alpha/beta-mediated  
83 phosphatidylinositol-4-phosphate is required to construct appropriate membrane structure for HCV replication  
84 (16-18), and components of lipoproteins such as apolipoprotein (APO) E and APOB play important roles in  
85 the maturation of HCV particles (19-21). Lipid rafts, LDs and their associated proteins are also involved in  
86 HCV replication (22-24). Therefore, HCV utilizes various cellular organelles and host factors to facilitate an  
87 efficient propagation.

88 Ubiquitination is a post-translational modification that regulates cellular homeostasis. The HCV core  
89 protein was reported to be ubiquitinated by E6-associated protein (E6AP) to suppress viral particle formation  
90 (25). Blockage of the cleavage of core protein by signal peptide peptidase (SPP) has been shown to induce  
91 ubiquitination of core protein by translocation in renal carcinoma on chromosome 8 (TRC8) to suppress  
92 induction of ER stress in culture cells (26). Zinc mesoporphyrin (ZnMP) has been reported to induce  
93 degradation of NS5A via ubiquitination (27). It was also reported that interferon-stimulated gene (ISG)-12a  
94 (ISG12) induced by HCV infection ubiquitinates and degrades NS5A by S-phase kinase-associated protein 2  
95 (SKP2) (28). NS5B was shown to interact with human homolog 1 of protein linking integrin-associated  
96 protein and cytoskeleton (hPLICs) to promote proteasomal degradation (29). In addition, HCV infection has  
97 been shown to induce ubiquitination of Parkin to promote mitophagy (30, 31) and regulate the ubiquitination

98 of retinoic acid-inducible gene-I (RIG-I) through the ISG15/PKR pathway (32). These data suggest that  
99 ubiquitination participates in various steps of the HCV lifecycle.

100 In this study, we found that treatment with an inhibitor of de-ubiquitinating enzymes (DUBs) or  
101 overexpression of non-specific DUBs impaired HCV replication, suggesting that ubiquitination is important  
102 for HCV propagation. An RNAi-mediated screening targeting DUB genes identified ubiquitin-specific  
103 protease 15 (USP15) as a novel host factor that participates in HCV replication. Translation of HCV RNA was  
104 significantly impaired in USP15-deficient Huh7 cells (USP15KOHuh7). Deficiency of USP15 in hepatic but  
105 not in non-hepatic cell lines significantly reduced the propagation of HCV. Unlike in previous reports, we  
106 found that USP15 was not involved in RIG-I-mediated innate immune responses *in vitro* and *in vivo*. In  
107 addition, we found that the expression of sterol regulatory element-binding protein (SREBP)-1c, a master  
108 regulator of fatty acid synthesis and LDs, was suppressed in USP15KOHuh7 cells. USP15 was localized on  
109 LDs, and the addition of fatty acids restored the production of infectious HCV particles in USP15KOHuh7  
110 cells. Taken together, these data suggest that USP15 is a crucial host factor for HCV propagation in hepatic  
111 cells through the regulation of viral RNA translation and lipid metabolism.

112

## 113 **Results**

### 114 **Ubiquitination is required for HCV propagation.**

115 To examine the importance of ubiquitination during HCV replication, HCV replicon cells were treated with  
116 PR-619, a non-specific DUB inhibitor. Intracellular HCV RNA was significantly reduced by the treatment  
117 with PR-619 without obvious cytotoxicity (Fig. 1A), suggesting that inhibition of DUBs impaired HCV

118 replication. OTUD7B, OTUB1 and OTUD1 are DUBs which specifically cleave the K11-, K48- and  
119 K63-linked ubiquitin chains from non-specific target proteins, respectively (33-35). Immunofluorescence  
120 microscopic observation of Huh7 cells overexpressing OTUD7B, OTUB1 and OTUD1 revealed the  
121 cytoplasmic localization of these DUBs, which suggested that all DUBs cleave ubiquitin chains of the target  
122 proteins in the cytoplasm (Fig. 1B and 1C). To examine which types of ubiquitination are involved in HCV  
123 replication, Huh7 cells overexpressing DUBs were infected with HCV. Overexpression of all DUBs in Huh7  
124 cells impaired HCV propagation (Fig. 1D), suggesting that the K11-, K48- and K63-linked of ubiquitination  
125 are required for HCV propagation.

#### 126 **RNAi screening to determine DUBs involved in HCV propagation.**

127 Because treatment with a DUB inhibitor and overexpression of non-specific DUBs suppressed HCV  
128 replication, we next tried to identify specific DUBs involved in HCV replication by RNAi-based screening  
129 (Fig. 2A). The family of DUBs consists of approximately 100 genes. We established 61 stable Huh7.5.1 cell  
130 lines, each of which expressed an shRNA against one of the DUBs (Fig. 2A, Step 1) and selected 30 of the cell  
131 lines that exhibited an at least 40% reduction of DUBs expression (Fig. 2A, Step 2). We then inoculated HCV  
132 into the 30 cell lines and quantified the intracellular HCV RNA levels after 4 days (Fig. 2A, Step 3). We found  
133 that the cell lines harboring an shRNA against USP15 exhibited the most efficient reduction of HCV RNA in  
134 our screening (Fig. 2B). Next, we confirmed that USP15 expression was reduced in Huh7.5.1 cells expressing  
135 shRNA to USP15 (shUSP15) compared in Huh7.5.1 cells expressing control shRNA to LacZ (shLacZ) (Fig.  
136 2C). In addition, the level of intracellular HCV RNA in Huh7.5.1 cells expressing shUSP15 upon infection

137 with HCV was significantly lower than that in the Huh7.5.1 cells expressing shLacZ (Fig. 2D). These data  
138 suggest that USP15 is involved in the propagation of HCV.

### 139 **Deficiency of USP15 impairs HCV propagation.**

140 To further confirm the effect of USP15 on HCV propagation, we established two USP15-knockout Huh7 cell  
141 lines (USP15KOHuh7 #8 and #22; Fig. 3A) using the CRISPR/Cas9 system. The cell growth (Fig. 3B) and  
142 expression of miR-122, a determinant of HCV propagation in hepatocytes (Fig. 3C), of the USP15KOHuh7  
143 cell lines were comparable to those of parental Huh7 cells. To evaluate the effect of USP15 deficiency on  
144 HCV propagation, Huh7 and USP15KOHuh7 cells were infected with HCV. Intracellular HCV RNA (Fig.  
145 3D), an infectious titer in the culture supernatants (Fig. 3E) and the ratio of extra- and intracellular HCV RNA  
146 (Fig. 3F) at 4 days post-infection were decreased in USP15KOHuh7 cells. Exogenous expression of USP15 in  
147 USP15KOHuh7 cells restored the production of infectious HCV particles (Fig. 3G, H). These data suggest that  
148 USP15 is involved in HCV propagation. In addition, Huh7 and USP15KOHuh7 cells were transfected with an  
149 HCV subgenomic replicon RNA by electroporation, and colony formation was determined. Deficiency of  
150 USP15 decreased the numbers of colonies compared to those in Huh7 cells (Fig. 3I). To further examine the  
151 roles of USP15 in translation of HCV RNA, *in vitro* transcribed HCV subgenomic RNA possessing mutation  
152 in the active sites of RNA-dependent RNA polymerase of NS5B and a secreted form of NanoLuc (NLuc) as a  
153 reporter (pSGR-NLuc-JFH1GND) was transduced into Huh7 and USP15KOHuh7 cells by electroporation.  
154 NLuc activities were significantly suppressed in the USP15KOHuh7 cell lines (#8 and #22) compared with  
155 those in parental Huh7 cells (Fig. 3J). On the other hand, the activity of cap-dependent translation exhibited no  
156 significant difference between Huh7 and USP15KOHuh7 cells (Fig. 3K). Collectively, these results suggest



157 that USP15 participates in HCV propagation through at least two distinct pathways, production of infectious  
158 particles and translation of viral RNA.

159 **USP15 supports HCV propagation in a hepatocyte-specific manner.**

160 Not only Huh7 cells but also Hep3B cells expressing miR-122 (Hep3B/miR-122), HepG2 cells expressing  
161 CD81 (HepG2/CD81) and 293T cells expressing miR-122, Claudin 1 (CLDN1) and APOE  
162 (293T/miR-122/CLDN1/APOE) have been shown to permit HCV propagation (36-38). To examine the  
163 effects of USP15 on HCV propagation in these cell lines, we established USP15KO cell lines in  
164 Hep3B/miR122 and 293T/miR-122/CLDN1/APOE cells (Fig. 4A and 4B). We could not obtain  
165 USP15-knockout HepG2/CD81 cells (data not shown). USP15KO and parental Hep3B/miR-122 cells were  
166 infected with HCV and intracellular HCV RNA was determined at 4 h and 4 days post-infection. Although  
167 intracellular HCV RNA levels were comparable in USP15KO and parental Hep3B/miR-122 cells at 4 h  
168 post-infection, they were significantly reduced in USP15KO cells at 4 days post-infection (Fig. 4C). Infectious  
169 titers in the culture supernatant at 4 days post-infection were also reduced in USP15KO cells (Fig. 4E). In  
170 contrast, intracellular HCV RNA in USP15KO and parental 293T/miR-122/CLDN1/APOE cells at 12 h and 2  
171 days post-infection (Fig. 4D) and infectious titers in the culture supernatant at 2 days post-infection (Fig. 4F)  
172 were comparable. To examine the effect of USP15 in 293T cells on translation of viral RNA, subgenomic  
173 HCV RNA of SGR-Nluc-JFH1GND was electroporated into USP15KO and parental 293T cells expressing  
174 miR-122. Although the expression of miR-122 in parental 293T cells significantly enhanced the translation  
175 efficiency of HCV RNA, Nluc activities were comparable among USP15KO and parental 293T cells

176 expressing miR-122 (Fig. 4G), suggesting that USP15 participates in HCV propagation in an  
177 miR-122-independent and hepatocyte-specific manner.

178 **USP15 is not involved in innate immune responses.**

179 USP15 has been reported as a DUB targeting tripartite motif-containing protein 25 (TRIM25) and positively  
180 regulated RIG-I-mediated innate immune responses (39). TRIM25 has been shown to conjugate the  
181 K63-linked ubiquitin chains to RIG-I to facilitate downstream signaling pathways (39). USP15 has reported to  
182 remove the K48-linked ubiquitin chains of TRIM25 mediated by the linear ubiquitin assembly complex  
183 (LUBAC) to protect TRIM25 from proteasomal degradation (39). On the other hand, USP15 has been shown  
184 to target RIG-I and to remove the K63-linked ubiquitin chains from RIG-I (40). RIG-I senses viral RNAs such  
185 as Japanese encephalitis virus (JEV) and vascular stomatitis virus (VSV) and activates downstream molecules  
186 to activate innate immune responses (41). In contrast, encephalomyocarditis virus (EMCV) is recognized by  
187 melanoma differentiation-associated gene 5 (MDA5) rather than RIG-I (41). To investigate the involvement of  
188 USP15 in RNA virus infection, parental and USP15KOHuh7 cells were infected with JEV, VSV and EMCV.

189 Although intracellular JEV RNA levels were comparable between parental and USP15KO cells (Fig. 5A),  
190 infectious titers in the culture supernatants at 2 days post-infection were slightly decreased in USP15KO cells  
191 (Fig. 5B). In contrast, viral titers of VSV and EMCV were comparable between parental and USP15KO cells  
192 (Fig. 5C and 5D). These data suggest that USP15 plays a small role in the propagation of JEV but is not  
193 involved in the propagation of VSV and EMCV.

194 To further assess the involvement of USP15 in RIG-I-mediated antiviral effects *in vivo*, we generated  
195 USP15<sup>-/-</sup> mice possessing deletion of 223 base pairs in the *Usp15* genomic locus by using the CRISPR/Cas9

196 system (Fig. 6A). The USP15<sup>-/-</sup> mice were fertile and visually normal as reported previously (42). We  
197 intranasally challenged the USP15<sup>-/-</sup>, USP15<sup>+/+</sup> and IFN $\alpha$ / $\beta$ R<sup>-/-</sup> mice with a lethal dose of VSV and monitored  
198 the survival rates and body weights. Deficiency of USP15 had no significant effect on the survival of mice  
199 against VSV infection, while IFN $\alpha$ / $\beta$ R<sup>-/-</sup> mice showed high sensitivity to VSV challenge (Fig. 6B) and the  
200 change of body weight was comparable between USP15<sup>+/+</sup> and USP15<sup>-/-</sup> mice (Fig. 6C), suggesting that  
201 USP15 does not participate in survival after VSV challenge. In addition, mouse embryonic fibroblasts (MEFs)  
202 prepared from USP15<sup>+/+</sup> and USP15<sup>-/-</sup> mice were infected with VSV and induction of ISGs was monitored.  
203 The inductions of *Ifna*, *Cxcl10* and *Il6* were comparable between the two MEFs (Fig. 6E to 6G). These results  
204 suggest that innate immune responses do not participate in the USP15-mediated enhancement of HCV  
205 propagation.

#### 206 **USP15 participates in lipid metabolism to facilitate HCV propagation.**

207 Due to a lack of information about the function of USP15 in hepatocytes, we investigated the roles of USP15  
208 during HCV infection. First, we investigated the possibility that USP15 interacts with viral proteins.  
209 Immunoprecipitation analysis revealed no interaction of USP15 with viral proteins (Fig. 7A). Confocal  
210 microscopic observation showed that USP15 co-localized with LDs (Fig. 7B). Previous reports suggest that  
211 LDs and lipid metabolism are important for HCV replication and infectious particle formation (19, 24, 43).  
212 Therefore, we investigated the roles of USP15 on formation of LDs. LDs in parental and USP15KO Huh7 cells  
213 were stained with HCS LipidTOX<sup>TM</sup> Red neutral lipid stain and observed by confocal microscopy. The  
214 amounts and sizes of LDs were significantly reduced in USP15KO cells compared with parental Huh7 cells  
215 (Fig. 7C and 7D). The adipose differentiation-related protein (ADRP) is a marker for LDs (44), and expression

216 of ADRP was significantly impaired in the USP15KOHuh7 cell lines (Fig. 7E). LDs consist of neutral lipids  
217 such as cholesterol esters and triglycerides (TGs) and function as storage sites for fatty acids (45). SREBP-1c  
218 and SREBP-2 are master transcriptional factors that regulate fatty acid synthesis and cholesterol synthesis,  
219 respectively (46, 47). Next, we examined the expression of these transcriptional factors in USP15KOHuh7  
220 cells. Expression of SREBP-1c but not SREBP-2 was significantly reduced in USP15KOHuh7 cells (Fig. 7F  
221 and 7G), suggesting that reduction of fatty acids production participates in the suppression of HCV  
222 propagation in USP15KOHuh7 cells. To verify this possibility, palmitic acid (PA) and oleic acid (OA) were  
223 added to the culture media in parental and USP15KOHuh7 cells, and intracellular HCV RNA was determined  
224 at 4 days post-infection with HCV. Although intracellular HCV RNA levels in both parental and  
225 USP15KOHuh7 cells exhibited no significant change by the addition of fatty acids (Fig. 7H and 7I), infectious  
226 titers in the culture supernatants of USP15KO but not those of parental Huh7 cells were significantly enhanced  
227 by the addition of PA, but not of OA (Fig. 7J and 7K). Taken together, these results suggest that USP15  
228 participates in the regulation of lipid metabolism and facilitates production of infectious HCV particles.

229

## 230 **Discussion**

231 In this study, we identified USP15 as a novel host factor for HCV propagation. This is the first report to  
232 identify a specific DUB involved in HCV propagation. Our data suggest that USP15 participates in at least two  
233 steps in the HCV life cycle: translation of viral RNA and production of infectious particles. HCV RNA is  
234 translated to viral proteins through the internal ribosomal entry site (IRES) (48). Deficiency of USP15  
235 significantly impaired the translation of viral RNA specific to HCV-IRES. In addition, lack of USP15 showed

236 no effect on HCV propagation in non-hepatic cells such as 293T cells, suggesting that USP15 targets  
237 hepatocyte-specific factors to regulate translation of HCV RNA. Liver-specific miR-122 binds to the two sites  
238 of HCV RNA to facilitate HCV replication (11, 49) and many reports suggest that binding of miR-122 to  
239 HCV RNA promotes translation of HCV RNA (50, 51). Because DUB is unlikely to directly interact with  
240 miR-122, USP15 may interact with components of the miR-122/AGO2 complex. Although activity of HCV  
241 IRES-mediated RNA translation was significantly enhanced by the expression of miR-122 as previously  
242 reported, deficiency of USP15 did not affect the enhancement of HCV IRES-mediated translation by the  
243 expression of miR-122 (Fig 4G), suggesting that USP15 participates in HCV IRES-mediated translation  
244 through an miR-122 independent pathway. Various host factors, such as heterogeneous nuclear  
245 ribonucleoprotein L (hnRNP L), nuclear factor (NF) 90, NF45, poly-C binding protein 2 (PCBP2), and  
246 insulin-like growth factor 2 mRNA-binding protein 1 (IGF2BP1), have been shown to participate in  
247 IRES-mediated translation and replication of HCV through the interaction between 5'- and 3'-UTR of HCV  
248 (52-55). Further studies are needed to understand the roles of USP15 in HCV RNA translation through the  
249 interaction with these host factors.

250 LDs are cellular organelles for the storage of TGs and have a single membrane (56). Once cells require  
251 energy, stored TGs undergo hydrolysis to produce fatty acids through the activation of lipolytic pathways. A  
252 number of LD-associated proteins have been identified. The perilipin family—which includes perilipin, ADRP,  
253 tail-interacting protein of 47 kilodaltons (TIP47), and S3-12 and myocardial lipid droplet protein  
254 (MLDP)/oxidative tissues-enriched PAT protein (OXPAT)/lipid storage droplet protein 5 (LSDP5)—are  
255 major regulators of LD homeostasis (57, 58). Among them, HCV NS5A interacts with TIP47 to facilitate

256 HCV replication (59). In addition, HCV core protein has been shown to displace ADRP from the LD surface  
257 (60) and to contribute to efficient virus assembly through interaction with LDs (61). In this study, we showed  
258 that USP15 co-localizes with LDs in Huh7 cells without any interaction with HCV proteins, suggesting that  
259 USP15 interacts with LD-associated proteins to regulate LD formation and is involved in viral assembly. We  
260 showed that lack of USP15 reduces the amounts of LDs in Huh7 cells. It is known that non-hepatic cells such  
261 as 293T cells possess small amounts of LDs, and in 293T cells LDs and LD-related fatty acids are not involved  
262 in the propagation of HCV. This might be one of the reasons that HCV propagation in USP15KO293T cells is  
263 comparable to that in parental cells. We also showed that expression of SREBP-1c was impaired in  
264 USP15KOHuh7 cells. It was demonstrated that HCV core protein enhances the binding of liver X receptor  $\alpha$   
265 (LXR $\alpha$ ) and retinoid X receptor  $\alpha$  (RXR $\alpha$ ) to LXR-response element during HCV infection (62, 63). These  
266 reports indicate that HCV core protein plays crucial roles in the modulation of lipid metabolism during HCV  
267 infection. However, immunoprecipitation analyses showed that USP15 does not interact with HCV core  
268 protein, suggesting that USP15 regulates lipid metabolism independent of the interaction with HCV core  
269 protein.

270 USP15 is expressed in various tissues and has been shown to be involved in various cellular events. USP15  
271 targets receptor-activated SMADs (R-SMADs) to regulate TGF- $\beta$  signaling (64). In addition, USP15 interacts  
272 with SMAD7 and SMAD-specific E3 ubiquitin protein ligase 2 (SMURF2) and de-ubiquitinates type I TGF- $\beta$   
273 receptor (65). USP15 has been reported to de-ubiquitinate Kelch-like ECH-associated protein 1 (Keap1),  
274 which regulates NF-E2-related factor (Nrf) 2-dependent antioxidant responses (66), murine double minute 2  
275 (MDM2) (42), histone H2B (H2B) (67), Nrf1 (68) and p62 (69). USP15 is also suggested to cleave ubiquitin

276 chains of viral proteins such as Nef of HIV-1 (70), HBx of HBV (71) and E6 protein of human papillomavirus  
277 (72). These reports indicate that USP15 participates in the development of many types of cancers, cellular  
278 homeostasis and virus infection. However, the substrates and function of USP15 in hepatocytes have not been  
279 clarified. We showed that the birth of USP15<sup>-/-</sup> mice followed Mendelian ratios, and the mouse pups developed  
280 normally and exhibited no obvious abnormalities, as reported previously (42). The phenotypes of USP15<sup>-/-</sup>  
281 mice and our data suggest that there are unknown substrates of USP15 which regulate lipid metabolism.  
282 Recently, USP15 has been shown to be a DUB for TRIM25 (39) and RIG-I (40) and to be involved in type I  
283 IFN response in cells infected with RNA viruses. Upon infection of HCV, viral RNA is sensed by RIG-I and  
284 type I IFN and ISG are induced (73). We examined the involvement of USP15 in innate immune responses  
285 and propagation of various RNA viruses and revealed that USP15 does not participate in either the survival of  
286 mice or innate immune responses in MEFs. These data suggest that USP15 is dispensable for the induction of  
287 innate immune responses upon infection with RNA viruses. Further characterization of USP15<sup>-/-</sup> mice is  
288 needed in order to elucidate the physiological function of USP15, especially in hepatocytes.

289 Fatty acids have been shown to support HCV replication in replicon cells (74, 75). On the other hand,  
290 several recent papers showed that fatty acids inhibit HCV replication (74, 76-78). In the present study, we  
291 found that deficiency of USP15 in Huh7 cells reduced the size and number of LDs, and addition of PA—but  
292 not of OA—partially restored the production of infectious HCV particles. We do not have any data indicating  
293 why OA did not support the production of infectious HCV. However, our data do suggest that PA and its  
294 metabolites support the production of infectious HCV particles. On the other hand, we could not observe the  
295 enhancement of HCV particle production by the treatment with PA in naive Huh7 cells due to the abundance

296 of LDs. Taken together, our data suggest that USP15 mainly contributes to replication of HCV RNA and  
297 partially supports HCV assembly.

298 In summary, we identified USP15 as a novel host protein involved in HCV propagation. USP15  
299 participates in HCV translation and plays a role in the production of infectious particles. Our data suggest that  
300 USP15 participates in the formation of LDs through the regulation of hepatic lipid metabolism to facilitate  
301 HCV propagation. Because USP15 possesses the enzymatic activity of de-ubiquitinatinase, and thus removes  
302 ubiquitin from substrates, in a future study it would be of interest to identify the substrates of USP15 in  
303 hepatocytes. The hepatocyte-specific substrates of USP15 that are crucial for HCV propagation might be novel  
304 drug targets for chronic hepatitis C.

305

## 306 **Materials and Methods**

307 **Cell lines and viruses.** Huh7, Huh7.5.1, Hep3B/miR122, Vero, 293T, Plat-E and BHK-21 cells were obtained  
308 from the National Institute of Infectious Diseases and were cultured in Dulbecco's Modified Eagle's medium  
309 (DMEM) supplemented with 10% fetal bovine serum (FBS), 100 U/ml penicillin and 10 µg/ml streptomycin.  
310 HCV replicon cells (9-13) (79) were maintained in DMEM supplemented with 10% FBS, 1 mg/ml G418, 100  
311 U/ml penicillin and 10 µg/ml streptomycin. HCV derived from the genotype 2a JFH-1 strain mutated in E2, p7  
312 and NS2 was prepared by serial passages in Huh7.5.1 cells as mentioned previously (80). JEV (AT31 strain)  
313 was propagated in C6/36 cells. VSV and EMCV were propagated in BHK-21 cells.

314 **Antibodies and reagents.** The following antibodies were used: anti-JEV NS3 monoclonal antibody (#578)  
315 (81), anti-HCV NS5A monoclonal antibody (5A27) (82), anti-ACTIN mouse monoclonal antibody (A2228,



316 Sigma-Aldrich), horseradish peroxidase-conjugated anti-FLAG mouse monoclonal antibody (A8592,  
317 Sigma-Aldrich), anti-USP15 monoclonal antibody (ab56900, abcam), anti-FLAG mouse monoclonal antibody  
318 (F1804, Sigma-Aldrich), anti-HA monoclonal antibody (clone 16B12, MMS-101P, Biolegend) and  
319 anti-Glu-Glu antibody (MMS-115P, Biolegend). Oleic acid (O1008) and Palmitic acid (P0500) were obtained  
320 from Sigma-Aldrich. PR-619 (SI9619) was purchased from Lifesensor. HCS LipidTOX™ Red neutral lipid  
321 stain was obtained from Thermo Fisher Scientific.

322 **Plasmids.** The shRNAs against each DUB were obtained from the Human shRNA library (Takara Bio). The  
323 pRSV-Rev (#12253), pMDLg/pRRE (#12251), pCMV-VSV-G (#8454), pX330 (#42230), and pCAG  
324 EGxxFP (#50716) were obtained from Addgene. Reporter plasmid, pGL3-Basic SREBP1c and pRL-TK were  
325 previously used (62). Lentiviral vectors expressing miR-122, APOE and Claudin 1 (CLDN1) were also used  
326 as described previously (19). The cDNAs of USP15, OTUB1, OTUD1 and OTUD7B obtained from Dr.  
327 Wade Harper (Addgene; #22570, #22551, #22553 and #22550) were amplified by PCR and cloned into pEF  
328 FLAG pGK puro (83) or FUIPW (26) by using an In-Fusion HD cloning kit (Takara Bio). HCV core, NS2,  
329 NS3, NS4B, NS5A and NS5B were amplified by PCR and cloned into pCAGGS (84). The sgRNAs of human  
330 USP15 (5'-CACCGCGACTATCGACTAGGTACC-3') and mouse USP15  
331 (5'-CACCGGTGTCCCCTTTCCGGAGCG-3') were cloned into pX330 by Ligation high Ver. 2 (Toyobo).  
332 Genomic DNAs of Huh7 cells or mouse tails were extracted by DirectPCR Lysis Reagents (Viagen Biotech),  
333 and amplified by PCR using the following primers sets: human USP15 (forward,  
334 5'-CAACCACTGAGGATCCGCTCCCGGTGTCTTTTGGTTTCGA-3'; reverse, 5'-  
335 TGCCGATATCGAATTCCTATCATTCGGGAAGGCCTGAGGT-3') and mouse USP15 (forward,

336 5'-CAACCACTGAGGATCCATTTGGTACAGACCTGCCGG-3'; reverse,  
337 5'-TGCCGATATCGAATTCTCGGAATAATGGGGAACTTGGG-3'). They were then cloned into pCAG  
338 EGxxFP by using an In-Fusion HD cloning kit. The pSGR-JFH1 was mutated in the GDD motif of NS5B to  
339 GND to generate an inactive form of RNA-dependent RNA polymerase. In addition, the cDNA of NanoLuc  
340 was replaced with the neo gene to generate pSGR-NLuc-JFH1GND. The cDNA of firefly luciferase (FLuc)  
341 was amplified and cloned into pCMVTNT vector (Promega) designed as pCMVTNT Fluc. All plasmids used  
342 in this study were confirmed by sequencing with an ABI Prism 3130 genetic analyzer (Thermo Fisher  
343 Scientific).

344 **RNAi screening.** Retroviruses expressing shRNAs against human DUBs were generated in Plat-E cells.  
345 Briefly, Plat-E cells ( $2 \times 10^6$  cells) were seeded on a 10 cm dish and incubated at 37°C for 24 h. 5 µg of  
346 retroviral transfer vector and 1 µg of pCMV-VSV-G were mixed with 500 µl of Opti-MEM and 40 µl of  
347 polyethylenimine (1 mg/ml; Polysciences) and incubated for 15 min. The DNA complex was inoculated into  
348 Plat-E cells, and the culture medium was changed at 4 h post-transfection. The culture supernatants were  
349 collected at 3 days post-transfection. Huh7.5.1 cells ( $2 \times 10^5$  cells per well) were seeded on six-well plates and  
350 were incubated for 24 h. The virus-containing culture supernatants (2 ml) and 8 µl of Polybrene (4 mg/ml;  
351 Sigma-Aldrich) were inoculated into Huh7.5.1 cells and centrifuged at  $1,220 \times g$  for 45 min at 32 °C. Stable  
352 cell lines were selected by puromycin at 2 days post-infection. To determine the efficiency of RNAi, the  
353 expression of each DUB was analyzed by using real-time PCR (qPCR) as described below. Huh7.5.1 cells  
354 expressing shRNA were seeded on 24-well plates ( $3 \times 10^4$  cells per well), incubated for 24 h and inoculated

355 with HCV at a multiplicity of infection (moi) of 0.5. After 2 h, the culture medium was changed and the  
356 infected cells were incubated for 4 days. Intracellular HCV RNA was quantified by qPCR.

357 **qRT-PCR.** Total RNA was extracted by using ISOGEN II (Nippon Gene). Real-time PCR for HCV or JEV  
358 RNA was performed by using a TaqMan RNA-to-Ct 1-Step Kit and a ViiA7 real-time PCR system  
359 (ThermoFisher Scientific). The following primers were used: HCV, 5'-GAGTGTCGTGCAGCCTCCA-3'  
360 and 5'-CACTCGCAAGCACCTATCA-3'; JEV, 5'-GGGTCAAAGTCATTTCTGGTCCATA-3' and  
361 5'-TCCACGCTGCTCGAA-3'; GAPDH, 5'-TGTAGTTGAGGTCAATGAAGGG-3' and 5'-  
362 ACATCGCTCAGACACCATG-3'. The following probes were used: HCV, 5'-6-FAM/  
363 CTGCGGAAC/ZEN/CGGTGAGTACAC/-3'IABkFQ; JEV,  
364 5'-6-FAM/ATGACCTCG/ZEN/CTCTCCC/-3'IABkFQ; GAPDH, 5'-6-FAM/AAGGTCCG-  
365 A/ZEN/GTCAACGGATTTGGTC/-3'IABkFQ. Relative amounts of HCV or JEV RNA were determined by  
366 the  $\Delta\Delta C_t$  method using GAPDH as an internal control. For gene expression analysis, qPCR was performed by  
367 using a Power SYBR Green RNA-to Ct 1-step Kit (Thermo Fisher Scientific). The primers used in this study  
368 are summarized in Table 1.

369 **Cell viability assay.** Huh7 (9-13) cells were seeded on 24-well plates ( $5 \times 10^4$  cells per well) and incubated at  
370 37°C for 24 h. PR-619 (0.5  $\mu$ M) was added and the cells were incubated for an additional 24 h. Supernatants  
371 containing cells and adherent cells were collected and stained with 5  $\mu$ g/ml of propidium iodide (PI, P4170;  
372 Sigma-Aldrich). Cell viability was determined by flow cytometry analyses (BD) using FlowJo software  
373 (FlowJo).

374 **Generation of USP15-knockout Huh7, Hep3B and 293T cells.** Gene-knockout Huh7, Hep3B/miR122 and  
375 293T cells were generated by using the CRISPR/Cas9 system as previously described (85). Briefly, cells were  
376 transfected with pX330 and pCAG EGxxFP and incubated for 1 week. GFP-positive cells were sorted by  
377 FACS and formed single colonies. Gene deficiency was confirmed by sequencing and western blotting.

378 ***In vitro* transcription, RNA transfection and colony formation.** The plasmid pSGR-JFH1 was linearized  
379 with XbaI and transcribed *in vitro* by using a MEGAscript T7 kit (ThermoFisher Scientific) according to the  
380 manufacturer's protocol. The pCMVTNT Fluc was linearized with BamHI and transcribed *in vitro* by using an  
381 mMESAGE mMACHINE T7 ULTRA Transcription Kit (ThermoFisher Scientific) according to the  
382 manufacturer's protocol. The *in vitro* transcribed RNA (10 µg) was electroporated into Huh7 cells ( $5 \times 10^6$   
383 cells) under conditions of 270 V and 950 µF using a Gene Pulser apparatus (Bio-Rad). For the transient  
384 experiments, cells were added into 10 ml of culture medium and plated on 12-well plates. For long-term  
385 colony formation, electroporated cells were plated in DMEM containing 10% FBS. The medium was replaced  
386 with fresh DMEM containing 10% FBS and 1 mg/ml G418 at 24 h post-electroporation. Colonies were  
387 visualized by staining with Giemsa (Merck) at 3 weeks post-electroporation.

388 **Immunofluorescence staining.** Huh7 cells were fixed with 4% paraformaldehyde in phosphate-buffered  
389 saline (PBS) for 2 h. Cells were washed by PBS and permeabilized by 0.2% TritonX-100 in PBS for 15 min.  
390 After washing with PBS, the fixed cells were incubated with anti-NS5A mouse monoclonal antibody or  
391 anti-USP15 mouse monoclonal antibody at room temperature for 1 h. After washing, cells were incubated with  
392 Alexa Fluor (AF) 488-conjugated anti-mouse antibody and HCS LipidTOX™ Red neutral lipid stain diluted  
393 by 2% FBS in PBS at room temperature for 1 h. The stained cells were covered with Prolong Gold AntiFade

394 Reagent with DAPI (Thermo Fisher Scientific) and observed by FluoView FV1000 confocal microscopy  
395 (Olympus).

396 **Immunoprecipitation and immunoblotting.** Cells were lysed with lysis buffer consisting of 20 mM  
397 Tris-HCl (pH 7.4), 135 mM NaCl, 1% Triton X-100, 1% glycerol, and protease inhibitor cocktail tablets  
398 (Roche), incubated for 30 min at 4°C, and subjected to centrifugation at 14,000 g for 15 min at 4°C. The  
399 supernatants were boiled at 95°C for 5 min and then incubated with anti-FLAG, HA or Glu-Glu antibodies at  
400 4°C for 90 min. After incubation with protein G-Sepharose 4B (GE Healthcare) at 4°C for 90 min, the beads  
401 were washed five times by lysis buffer and boiled at 95°C for 5 min. The proteins were resolved by  
402 SDS-PAGE (Novex gels; Invitrogen), transferred onto nitrocellulose membranes (iBlot; Life Technologies),  
403 blocked with PBS containing 0.05% Tween 20 and 5% skim milk, incubated with primary antibody at 4°C for  
404 12 h, and then incubated with horseradish peroxidase (HRP)-conjugated secondary antibody at room  
405 temperature for 1 h. The immune complexes were visualized with Super Signal West Femto substrate (Pierce)  
406 and detected by an LAS-3000 image analyzer system (Fujifilm).

407 **Virus titration.** Viral titers of HCV and JEV were determined by a focus forming assay as described  
408 previously (26). Viral titers of VSV and EMCV were quantified by a plaque forming assay using BHK-21  
409 cells.

410 **Generation of USP15<sup>-/-</sup> mice.** USP15<sup>-/-</sup> mice were generated as previously described using a C57BL/6N  
411 genetic background (41). The pX330 containing an sgRNA against the mouse *Usp15* gene was injected into  
412 mouse zygotes and transplanted into pseudopregnant female mice. The obtained mice (F1) were crossed with

413 wild type mice and F2 mice and their DNA sequences were analyzed using the primers

414 5'-ATTTGGTACAGACCTGCCGG-3' (forward) and 5'-TCGGAATAATGGGGAACTTGGG-3' (reverse).

415 **Ethics Statement.** All animal experiments were approved by the Institutional Committee of Laboratory

416 Animal Experimentation (Research Institute for Microbial Diseases, Osaka University; project number:

417 H27-06-0).

418 **VSV infection *in vivo*.** USP15<sup>+/+</sup>, USP15<sup>-/-</sup> and IFN $\alpha$ / $\beta$ R<sup>-/-</sup> mice (16-17 weeks old) were intranasally infected

419 with VSV ( $4 \times 10^6$  pfu). Their survivals and body weights were monitored.

420 **Reporter assay.** Huh7 cells, USP15KOHuh7 and USP15KOHuh7 cells expressing USP15 were transfected

421 with pGL3-Basic SREBP-1c and pRL-TK and incubated for 2 days. Luciferase activity was determined by

422 using a Dual-Luciferase Reporter Assay System (Promega).

423 **Treatment with palmitic acid and Oleic acid.** Palmitic acid (PA) and oleic acid (OA) were dissolved in

424 ethanol. Dissolved fatty acids were mixed with 10% fatty acid-free BSA (Sigma-Aldrich) to make a complex

425 of fatty acid and BSA. Huh7 or USP15KOHuh7 cells were infected with HCV and treated with PA or OA for

426 4 days.

427 **Statistical analysis.** All experiments were performed in triplicate with at least 3 independent experiments. All

428 data represent the means  $\pm$  SD of the independent experiments. The statistical analyses were performed using

429 GraphPad Prism (GraphPad Prism Software). Significant differences were determined using Student's *t*-test

430 and are indicated with asterisks (\* $P < 0.05$ ) and double asterisks (\*\* $P < 0.01$ ) in each figure. Significant

431 differences of *in vivo* survival data were determined using a log-rank test and are indicated with asterisks

432 (\* $P < 0.05$ ) and double asterisks (\*\* $P < 0.01$ ) in each figure.

433

#### 434 **Acknowledgements**

435 The authors are grateful to M. Tomiyama for secretarial work, and M. Ishibashi for technical assistance. We  
436 also thank D.C.S. Huang, R. Bartenschlager, F. Chisari, and T. Wakita for providing experimental materials.

437 The Core Instrumentation Facility of Osaka University conducted the FACS sorting.

438 This work was supported by the Program for Basic and Clinical Research on Hepatitis from the Japan Agency

439 for Medical Research and Development (AMED) (JP18fk0210006h0003, JP17fk0210305h0003,

440 JP18fk0210010h0003, JP18fk0210009h0503, JP17fk0210304h0003, JP18fk0210040h0001,

441 and JP18fk0108036h0002), by the Ministry of Education, Culture, Sports, Science, and Technology (MEXT)

442 of Japan (JP16H06432, JP16H06429, JP16K21723, JP15H04736, JP16K19139) and by the Research Program

443 on Emerging and Re-emerging Infectious Diseases (17fk0108109h0001).

444

#### 445 **Author contributions**

446 T.O. and Y.M. designed the research; S.K., T.O. and Tatsuya Suzuki performed most of the experiments. Y.S.,

447 S.H., K.H., M.T., J.H., Z.H., D.V.C., H.I., P.D.N., Y.K., C.O. and T.F. assisted with the experiments; M.Y.

448 provided the RNAi library; M.I. generated USP15<sup>-/-</sup> mice; T.T., K.M., M.F., A.T. and Tetsuro Suzuki provided

449 valuable materials; T. Satoh and S.A. provided IFN $\alpha$ / $\beta$ R<sup>-/-</sup> mice and assisted with the experiments; T.O. and

450 Y.M. obtained research grants and wrote the manuscript.

451

#### 452 **Figure legends**

453 **Figure 1. Ubiquitination is important for HCV replication.**

454 (A) HCV replicon (9-13) cells were treated with PR-619, a non-selective DUB inhibitor, or DMSO for 24 h,  
455 and cell viability and intracellular HCV RNA were determined by PI staining and qPCR, respectively. (B)  
456 Expression of FLAG-tagged OTUD7B, OTUB1 and OTUD1 in Huh7 cells was detected by Western blotting  
457 using anti-FLAG antibody. (C) Subcellular localization of OTUD7B, OTUB1 or OTUD1 overexpression in  
458 Huh7 cells was observed by confocal microscopy. Each DUB (green) or nucleus (blue) was stained with  
459 anti-FLAG antibody and DAPI, respectively. (D) HCV was infected into Huh7 cells expressing the indicated  
460 DUBs at an moi of 3. After 4 days post-infection, the culture supernatants were collected and infectious HCV  
461 titers in the culture supernatants were determined by a focus forming assay.

462 **Figure 2. RNAi screening to identify specific DUBs involved in HCV propagation.**

463 (A) A schematic representation of the experimental procedure for our RNAi screening is shown. Huh7.5.1  
464 cells were infected with retroviruses expressing shRNA targeting DUBs (shDUBs). The expression of the  
465 DUB gene was confirmed in each of the Huh7.5.1 cell lines expressing shDUBs. The shDUB Huh7.5.1 cell  
466 lines that exhibited a more than 40% reduction in the expression of their specific DUB were selected for  
467 further screening. DUB-knockdown Huh7.5.1 cells were infected with HCV at an moi of 0.5, and intracellular  
468 HCV RNAs were quantified after 4 days. (B) The levels of intracellular HCV RNAs at 4 days post-infection  
469 were determined by qPCR as a relative value against GAPDH mRNA in cells. Data are presented as the  
470 relative values compared to those in Huh7.5.1 cells expressing shRNA against the LacZ gene. (C) The  
471 expression of USP15 in Huh7.5.1 cells expressing shRNA targeting LacZ (shLacZ) or USP15 (shUSP15) was



472 quantified by qPCR. (D) Huh7.5.1 cells expressing shRNA targeting LacZ or USP15 were infected with HCV  
473 at an moi of 0.5. The levels of intracellular HCV RNAs were determined by qPCR at the indicated time points.

474 **Figure 3. Deficiency of USP15 impaired HCV propagation.**

475 (A) USP15-deficient Huh7 (USP15KOHuh7) cells were generated using a CRISPR/Cas9 system. The  
476 expression of USP15 was confirmed by immunoblotting. We successfully established two independent  
477 USP15KOHuh7 clones. (B) WT and USP15KOHuh7 cells were seeded onto 24-well plates and incubated for  
478 4 days. The cell growth of each cell line was analyzed by using an MTT assay kit (Nacalai Tesque, Kyoto,  
479 Japan) according to the manufacturer's protocol. (C) The expression of miR-122 in WT and USP15KOHuh7  
480 cells was quantified by qPCR. U6 RNA was used as the internal control. (D) HCV was infected into WT and  
481 USP15KOHuh7 cells at an moi of 3. After 4 h or 4 days post-infection, intracellular HCV RNA was quantified  
482 by qPCR using GAPDH mRNA as the internal control. (E) WT and USP15KOHuh7 cells were infected with  
483 HCV at an moi of 3. After 4 days post-infection, infectious titers in the culture supernatants were determined  
484 by focus-forming assay. (F) The WT and USP15KOHuh7 cells were infected with HCV at an moi of 3. After  
485 4 days post-infection, extracellular and intracellular HCV RNAs were quantified by qPCR. The ratios between  
486 intracellular and extracellular HCV RNA were calculated as HCV RNA rates. (G) USP15KOHuh7 cells were  
487 transfected with a plasmid expressing FLAG-USP15, and USP15KOHuh7 cells expressing FLAG-USP15  
488 cells were established. The expression of USP15 was confirmed by immunoblotting. (H) USP15KOHuh7,  
489 those with restored USP15 and Huh7 cells were infected with HCV. After 4 days post-infection, infectious  
490 titers in the culture supernatants were determined by focus-forming assay. (I) *In vitro* transcribed HCV  
491 subgenomic replicon RNA (pSGR-JFH1) was electroporated into WT and USP15KOHuh7 cells, and the cells

492 were incubated for 3 weeks in the presence of 1 mg/mL of G418. Colonies were visualized by Giemsa staining.

493 (J) *In vitro* transcribed HCV subgenomic replicon RNA (pSGR-NLuc-JFH1GND) was electroporated into

494 WT and USP15KOHuh7 cells, and the activity of Nluc in culture supernatants was monitored. (K) *In vitro*

495 transcribed capped-Fluc RNA was electroporated into parental and USP15KO Huh7 cells and the activity of

496 Fluc in electroporated cells was monitored.

497 **Figure 4. Cell-type-specific reduction of HCV propagation in USP15KO cells.**

498 (A) USP15KOHep3B/miR122 cells were generated using the CRISPR/Cas9 system. The expression of

499 USP15 was confirmed by immunoblotting. (B) USP15KO293T cells were also generated using the

500 CRISPR/Cas9 system, and subjected to immunoblotting to confirm the USP15 expression. (C)

501 USP15KOHep3B/miR-122 and parental Hep3B/miR-122 cells were infected with HCV at an moi of 3. After

502 4 h or 4 days post-infection, intracellular HCV RNA was quantified by qPCR using GAPDH mRNA as the

503 internal control. (D) Parental and USP15KO 293T cells were lentivirally transduced with miR-122, CLDN1

504 and APOE, and then infected with HCV (moi=10) at 2 days post-transduction. After 12 h or 2 days

505 post-infection, intracellular HCV RNAs were quantified by qPCR. (E) Infectious titers of parental and

506 USP15KO Hep3B/miR-122 cells in the culture supernatants were determined by focus forming assay at 4 days

507 post-infection. (F) Infectious titers of parental and USP15KO 293T cells in the culture supernatants were

508 determined by focus forming assay at 2 days post-infection. (G) *In vitro* transcribed subgenomic HCV replicon

509 RNA (SGR-NLuc-JFH1GND) was electroporated into parental and USP15KO 293T cells expressing

510 miR-122, and the activity of Nluc in the culture supernatants was determined.

511 **Figure 5. USP15 is partially involved in propagation of JEV but not VSV or EMCV.**

512 (A) WT or USP15KOHuh7 cells were infected with JEV at an moi of 3. Intracellular JEV RNA was  
513 quantified by qPCR at each time point. (B) WT or USP15KOHuh7 cells were injected with JEV at an moi of 3  
514 and incubated for 2 days. Infectious JEV titers in the culture supernatants were determined by focus forming  
515 assay. (C) WT and USP15KOHuh7 cells were infected with VSV at an moi of 3. Infectious VSV titers in the  
516 culture supernatants were determined by plaque forming assay at the indicated time points. (D) WT and  
517 USP15KOHuh7 cells were infected with EMCV at an moi of 1. Infectious EMCV titers in the culture  
518 supernatants were determined by plaque forming assay at the indicated time points.

519 **Figure 6. USP15 is not involved in innate immune responses *in vivo*.**

520 (A) Generation of USP15<sup>-/-</sup> mice. Small letters indicate parts of introns and capital letters indicate exon 1. The  
521 red color sequence is the open reading frame of exon 1 of USP15. Sequences of the guide RNA targeting  
522 USP15 are underlined. USP15<sup>-/-</sup> mice possessed the 223-nucleotide deletion shown in bold. (B, C) USP15<sup>+/+</sup>  
523 (N=10), USP15<sup>-/-</sup> (N=6) and IFN $\alpha$ /BR<sup>-/-</sup> (N=5) mice (16-17 weeks old) were intranasally infected with VSV (4  
524  $\times 10^6$  pfu) and their survival rates (B) and body weights (C) were monitored daily. Body weight changes at  
525 each time point were indicated as the relative values against the body weights of mice at 1 day post-infection.  
526 (D) MEFs were prepared from USP15<sup>-/-</sup> and USP15<sup>+/+</sup> mice. The expression of USP15 was confirmed by  
527 immunoblotting. (E, F, G) MEFs infected with VSV at an moi of 1 were collected at each time point and the  
528 mRNAs of *Ifna* (E), *Cxcl10* (F) and *Il6* (G) were quantified by qPCR.

529 **Figure 7. USP15 controls LD formation to facilitate HCV propagation.**

530 (A) Interactions between FLAG-USP15 and HA-tagged viral proteins in 293T cells were evaluated by  
531 immunoprecipitation with antibodies to FLAG (FL)-, HA- and Glu/Glu-tag (Control, C). Immunoprecipitants

532 were subjected to immunoblotting by using FLAG and HA antibodies. (B) Subcellular localization of USP15  
533 in Huh7 cells was observed by confocal microscopy. USP15 (green), lipid droplets (red) or nuclei (blue) were  
534 stained with anti-USP15 antibody, HCS LipidTOX™ Red neutral lipid stains and DAPI, respectively. (C)  
535 Lipid droplets in WT or USP15KOHuh7 cells were observed by confocal microscopy. Lipid droplets (red) or  
536 nuclei (blue) were stained with HCS LipidTOX™ Red neutral lipid stains and DAPI, respectively. (D) The  
537 intensity of stained LDs was quantified by FACS. (E) The expression of ADRP, a marker of LDs, in parental  
538 and USP15KO Huh7 cells was detected by immunoblotting by using the indicated antibodies. (F) The  
539 expressions of SREBP-1c in the WT cells, USP15KO cells and restored USP15 Huh7 cells were examined by  
540 using reporter assay. Huh7 cells, USP15KOHuh7 and USP15KOHuh7 cells expressing USP15 were  
541 transfected with pGL3-Basic SREBP-1c and pRL-TK and incubated for 2 days. Luciferase activity was  
542 determined by using a Dual-Luciferase Reporter Assay System (Promega, Madison, WI). (G) Expression of  
543 SREBP2 in parental and USP15KO Huh7 cells was quantified by qPCR. mRNA of GAPDH was used as the  
544 internal control. (H, J) WT and USP15KO Huh7 cells were treated with 100 or 200  $\mu$ M palmitic acid (PA)  
545 during HCV infection at an moi of 3. After 4 days post-infection, intracellular HCV RNA (H) or infectious  
546 HCV titers (J) in culture supernatants were determined. (I, K) WT and USP15KOHuh7 cells were treated with  
547 100 or 200  $\mu$ M oleic acid (OA) during HCV infection at an moi of 3. After 4 days post-infection, intracellular  
548 HCV RNA (I) or infectious HCV titers (K) in the culture supernatants were determined.

## 549 **References**

- 550 1. **Paul D, Madan V, Bartenschlager R.** 2014. Hepatitis C Virus RNA Replication and Assembly: Living  
551 on the Fat of the Land. *Cell Host Microbe* **16**:569–579.

- 552 2. **Maasoumy B, Wedemeyer H.** 2012. Natural history of acute and chronic hepatitis C. *Best Pract Res*  
553 *Clin Gastroenterol* **26**:401–412.
- 554 3. **Barba G, Harper F, Harada T, Kohara M, Goulinet S, Matsuura Y, Eder G, Schaff Z, Chapman**  
555 **MJ, Miyamura T, Brechot C.** 1997. Hepatitis C virus core protein shows a cytoplasmic localization and  
556 associates to cellular lipid storage droplets. *Proc Natl Acad Sci USA* **94**:1200–1205.
- 557 4. **Suzuki R, Matsuura Y, Suzuki T, Ando A, Chiba J, Harada S, Saito I, Miyamura T.** 1995. Nuclear  
558 localization of the truncated hepatitis C virus core protein with its hydrophobic C terminus deleted. *J Gen*  
559 *Viro* **76 ( Pt 1)**:53–61.
- 560 5. **Schwer B, Ren S, Pietschmann T, Kartenbeck J, Kaehlcke K, Bartenschlager R, Yen TSB, Ott M.**  
561 2004. Targeting of hepatitis C virus core protein to mitochondria through a novel C-terminal localization  
562 motif. *J Virol* **78**:7958–7968.
- 563 6. **Suzuki R, Sakamoto S, Tsutsumi T, Rikimaru A, Tanaka K, Shimoike T, Moriishi K, Iwasaki T,**  
564 **Mizumoto K, Matsuura Y, Miyamura T, Suzuki T.** 2005. Molecular determinants for subcellular  
565 localization of hepatitis C virus core protein. *J Virol* **79**:1271–1281.
- 566 7. **Matto M, Rice CM, Aroeti B, Glenn JS.** 2004. Hepatitis C virus core protein associates with  
567 detergent-resistant membranes distinct from classical plasma membrane rafts. *J Virol* **78**:12047–12053.
- 568 8. **Galossi A, Guarisco R, Bellis L, Puoti C.** 2007. Extrahepatic manifestations of chronic HCV infection. *J*  
569 *Gastrointestin Liver Dis* **16**:65–73.
- 570 9. **Moriya K, Fujie H, Shintani Y, Yotsuyanagi H, Tsutsumi T, Ishibashi K, Matsuura Y, Kimura S,**  
571 **Miyamura T, Koike K.** 1998. The core protein of hepatitis C virus induces hepatocellular carcinoma in

- 572 transgenic mice. *Nat Med* **4**:1065–1067.
- 573 10. **Shintani Y, Fujie H, Miyoshi H, Tsutsumi T, Tsukamoto K, Kimura S, Moriya K, Koike K.** 2004.
- 574 Hepatitis C virus infection and diabetes: direct involvement of the virus in the development of insulin
- 575 resistance. *Gastroenterology* **126**:840–848.
- 576 11. **Jopling CL, Yi M, Lancaster AM, Lemon SM, Sarnow P.** 2005. Modulation of hepatitis C virus RNA
- 577 abundance by a liver-specific MicroRNA. *Science* **309**:1577–1581.
- 578 12. **Jopling CL, Schutz S, Sarnow P.** 2008. Position-dependent function for a tandem microRNA
- 579 miR-122-binding site located in the hepatitis C virus RNA genome. *Cell Host Microbe* **4**:77–85.
- 580 13. **Kaul A, Stauffer S, Berger C, Pertel T, Schmitt J, Kallis S, Zayas M, Lohmann V, Luban J,**
- 581 **Bartenschlager R.** 2009. Essential role of cyclophilin A for hepatitis C virus replication and virus
- 582 production and possible link to polyprotein cleavage kinetics. *PLoS Pathog* **5**:e1000546.
- 583 14. **Okamoto T, Nishimura Y, Ichimura T, Suzuki K, Miyamura T, Suzuki T, Moriishi K, Matsuura Y.**
- 584 2006. Hepatitis C virus RNA replication is regulated by FKBP8 and Hsp90. *EMBO J* **25**:5015–5025.
- 585 15. **Kasai H, Kawakami K, Yokoe H, Yoshimura K, Matsuda M, Yasumoto J, Maekawa S, Yamashita**
- 586 **A, Tanaka T, Ikeda M, Kato N, Okamoto T, Matsuura Y, Sakamoto N, Enomoto N, Takeda S,**
- 587 **Fujii H, Tsubuki M, Kusunoki M, Moriishi K.** 2015. Involvement of FKBP6 in hepatitis C virus
- 588 replication. *Sci Rep* **5**:16699.
- 589 16. **Tai AW, Benita Y, Peng LF, Kim S-S, Sakamoto N, Xavier RJ, Chung RT.** 2009. A functional
- 590 genomic screen identifies cellular cofactors of hepatitis C virus replication. *Cell Host Microbe* **5**:298–
- 591 307.

- 592 17. **Berger KL, Cooper JD, Heaton NS, Yoon R, Oakland TE, Jordan TX, Mateu G, Grakoui A,**  
593 **Randall G.** 2009. Roles for endocytic trafficking and phosphatidylinositol 4-kinase III alpha in hepatitis  
594 C virus replication. *Proc Natl Acad Sci USA* **106**:7577–7582.
- 595 18. **Reiss S, Rebhan I, Backes P, Romero-Brey I, Erfle H, Matula P, Kaderali L, Poenisch M,**  
596 **Blankenburg H, Hiet M-S, Longerich T, Diehl S, Ramirez F, Balla T, Rohr K, Kaul A, Buhler S,**  
597 **Pepperkok R, Lengauer T, Albrecht M, Eils R, Schirmacher P, Lohmann V, Bartenschlager R.**  
598 2011. Recruitment and activation of a lipid kinase by hepatitis C virus NS5A is essential for integrity of  
599 the membranous replication compartment. *Cell Host Microbe* **9**:32–45.
- 600 19. **Fukuhara T, Wada M, Nakamura S, Ono C, Shiokawa M, Yamamoto S, Motomura T, Okamoto T,**  
601 **Okuzaki D, Yamamoto M, Saito I, Wakita T, Koike K, Matsuura Y.** 2014. Amphipathic  
602 alpha-helices in apolipoproteins are crucial to the formation of infectious hepatitis C virus particles. *PLoS*  
603 *Pathog* **10**:e1004534.
- 604 20. **Huang H, Sun F, Owen DM, Li W, Chen Y, Gale MJ, Ye J.** 2007. Hepatitis C virus production by  
605 human hepatocytes dependent on assembly and secretion of very low-density lipoproteins. *Proc Natl*  
606 *Acad Sci USA* **104**:5848–5853.
- 607 21. **Chang K-S, Jiang J, Cai Z, Luo G.** 2007. Human apolipoprotein e is required for infectivity and  
608 production of hepatitis C virus in cell culture. *J Virol* **81**:13783–13793.
- 609 22. **Shi ST, Lee KJ, Aizaki H, Hwang SB, Lai MMC.** 2003. Hepatitis C Virus RNA Replication Occurs on  
610 a Detergent-Resistant Membrane That Cofractionates with Caveolin-2. *J Virol* **77**:4160–4168.
- 611 23. **Aizaki H, Lee K-J, Sung VM-H, Ishiko H, Lai MMC.** 2004. Characterization of the hepatitis C virus

- 612 RNA replication complex associated with lipid rafts. *Virology* **324**:450–461.
- 613 24. **Miyanari Y, Atsuzawa K, Usuda N, Watashi K, Hishiki T, Zayas M, Bartenschlager R, Wakita T,**  
614 **Hijikata M, Shimotohno K.** 2007. The lipid droplet is an important organelle for hepatitis C virus  
615 production. *Nat Cell Biol* **9**:1089–1097.
- 616 25. **Shirakura M, Murakami K, Ichimura T, Suzuki R, Shimoji T, Fukuda K, Abe K, Sato S,**  
617 **Fukasawa M, Yamakawa Y, Nishijima M, Moriishi K, Matsuura Y, Wakita T, Suzuki T, Howley**  
618 **PM, Miyamura T, Shoji I.** 2007. E6AP Ubiquitin Ligase Mediates Ubiquitylation and Degradation of  
619 Hepatitis C Virus Core Protein. *J Virol* **81**:1174–1185.
- 620 26. **Aizawa S, Okamoto T, Sugiyama Y, Kouwaki T, Ito A, Suzuki T, Ono C, Fukuhara T, Yamamoto**  
621 **M, Okochi M, Hiraga N, Imamura M, Chayama K, Suzuki R, Shoji I, Moriishi K, Moriya K,**  
622 **Koike K, Matsuura Y.** 2017. TRC8-dependent degradation of hepatitis C virus immature core protein  
623 regulates viral propagation and pathogenesis. *Nat Commun* **7**:1–12.
- 624 27. **Hou W, Tian Q, Zheng J, Bonkovsky HL.** 2010. Zinc mesoporphyrin induces rapid proteasomal  
625 degradation of hepatitis C nonstructural 5A protein in human hepatoma cells. *Gastroenterology*  
626 **138**:1909–1919.
- 627 28. **Xue B, Yang D, Wang J, Xu Y, Wang X, Qin Y, Tian R, Chen S, Xie Q, Liu N, Zhu H.** 2016.  
628 ISG12a Restricts Hepatitis C Virus Infection through the Ubiquitination-Dependent Degradation Pathway.  
629 *J Virol* **90**:6832–6845.
- 630 29. **Gao L, Tu H, Shi ST, Lee K-J, Asanaka M, Hwang SB, Lai MMC.** 2003. Interaction with a  
631 ubiquitin-like protein enhances the ubiquitination and degradation of hepatitis C virus RNA-dependent



- 632 RNA polymerase. *J Virol* **77**:4149–4159.
- 633 30. **Kim S-J, Syed GH, Siddiqui A.** 2013. Hepatitis C virus induces the mitochondrial translocation of  
634 Parkin and subsequent mitophagy. *PLoS Pathog* **9**:e1003285.
- 635 31. **Kim S-J, Syed GH, Khan M, Chiu W-W, Sohail MA, Gish RG, Siddiqui A.** 2014. Hepatitis C virus  
636 triggers mitochondrial fission and attenuates apoptosis to promote viral persistence. *Proc Natl Acad Sci*  
637 *USA* **111**:6413–6418.
- 638 32. **Arnaud N, Dabo S, Akazawa D, Fukasawa M, Shinkai-Ouchi F, Hugon J, Wakita T, Meurs EF.**  
639 2011. Hepatitis C virus reveals a novel early control in acute immune response. *PLoS Pathog*  
640 **7**:e1002289.
- 641 33. **Bremm A, Freund SMV, Komander D.** 2010. Lys11-linked ubiquitin chains adopt compact  
642 conformations and are preferentially hydrolyzed by the deubiquitinase Cezanne. *Nat Struct Mol Biol*  
643 **17**:939–947.
- 644 34. **Wang T, Yin L, Cooper EM, Lai M-Y, Dickey S, Pickart CM, Fushman D, Wilkinson KD, Cohen**  
645 **RE, Wolberger C.** 2009. Evidence for Bidentate Substrate Binding as the Basis for the K48 Linkage  
646 Specificity of Otubain 1. *J Mol Biol* **386**:1011–1023.
- 647 35. **Mevissen TET, Hospenthal MK, Geurink PP, Elliott PR, Akutsu M, Arnaudo N, Ekkebus R,**  
648 **Kulathu Y, Wauer T, Oualid El F, Freund SMV, Ovaa H, Komander D.** 2013. OTU  
649 Deubiquitinases Reveal Mechanisms of Linkage Specificity and Enable Ubiquitin Chain Restriction  
650 Analysis. *Cell* **154**:169–184.
- 651 36. **Narbus CM, Israelow B, Sourisseau M, Michta ML, Hopcraft SE, Zeiner GM, Evans MJ.** 2011.

- 652 HepG2 cells expressing microRNA miR-122 support the entire hepatitis C virus life cycle. *J Virol*  
653 **85**:12087–12092.
- 654 37. **Da Costa D, Turek M, Felmlee DJ, Girardi E, Pfeffer S, Long G, Bartenschlager R, Zeisel MB,**  
655 **Baumert TF.** 2012. Reconstitution of the entire hepatitis C virus life cycle in nonhepatic cells. *J Virol*  
656 **86**:11919–11925.
- 657 38. **Kambara H, Fukuhara T, Shiokawa M, Ono C, Ohara Y, Kamitani W, Matsuura Y.** 2012.  
658 Establishment of a novel permissive cell line for the propagation of hepatitis C virus by expression of  
659 microRNA miR122. *J Virol* **86**:1382–1393.
- 660 39. **Pauli E-K, Chan YK, Davis ME, Gableske S, Wang MK, Feister KF, Gack MU.** 2014. The  
661 ubiquitin-specific protease USP15 promotes RIG-I-mediated antiviral signaling by deubiquitylating  
662 TRIM25. *Sci Signal* **7**:ra3.
- 663 40. **Zhang H, Wang D, Zhong H, Luo R, Shang M, Liu D, Chen H, Fang L, Xiao S.** 2015.  
664 Ubiquitin-specific Protease 15 Negatively Regulates Virus- induced Type I Interferon Signaling via  
665 Catalytically-dependent and -independent Mechanisms. *Sci Rep* **5**:11220.
- 666 41. **Kato H, Takeuchi O, Sato S, Yoneyama M, Yamamoto M, Matsui K, Uematsu S, Jung A, Kawai T,**  
667 **Ishii KJ, Yamaguchi O, Otsu K, Tsujimura T, Koh C-S, Reis e Sousa C, Matsuura Y, Fujita T,**  
668 **Akira S.** 2006. Differential roles of MDA5 and RIG-I helicases in the recognition of RNA viruses.  
669 *Nature* **441**:101–105.
- 670 42. **Zou Q, Jin J, Hu H, Li HS, Romano S, Xiao Y, Nakaya M, Zhou X, Cheng X, Yang P, Lozano G,**  
671 **Zhu C, Watowich SS, Ullrich SE, Sun S-C.** 2014. USP15 stabilizes MDM2 to mediate cancer-cell

- 672 survival and inhibit antitumor T cell responses. *Nat Immunol* **15**:562–570.
- 673 43. **Shi ST, Polyak SJ, Tu H, Taylor DR, Gretch DR, Lai MMC.** 2002. Hepatitis C virus NS5A  
674 colocalizes with the core protein on lipid droplets and interacts with apolipoproteins. *Virology* **292**:198–  
675 210.
- 676 44. **Brasaemle DL, Barber T, Wolins NE, Serrero G, Blanchette-Mackie EJ, Londos C.** 1997. Adipose  
677 differentiation-related protein is an ubiquitously expressed lipid storage droplet-associated protein. *J Lipid*  
678 *Res* **38**:2249–2263.
- 679 45. **Farese RVJ, Walther TC.** 2009. Lipid droplets finally get a little R-E-S-P-E-C-T. *Cell* **139**:855–860.
- 680 46. **Pai JT, Guryev O, Brown MS, Goldstein JL.** 1998. Differential stimulation of cholesterol and  
681 unsaturated fatty acid biosynthesis in cells expressing individual nuclear sterol regulatory  
682 element-binding proteins. *J Biol Chem* **273**:26138-26148.
- 683 47. **Horton JD, Shimomura I, Brown MS, Hammer RE, Goldstein JL, Shimano H.** 1998. Activation of  
684 cholesterol synthesis in preference to fatty acid synthesis in liver and adipose tissue of transgenic mice  
685 overproducing sterol regulatory element-binding protein-2. *J Clin Invest* **101**:2331-2339.
- 686 48. **Honda M, Ping LH, Rijnbrand RC, Amphlett E, Clarke B, Rowlands D, Lemon SM.** 1996.  
687 Structural requirements for initiation of translation by internal ribosome entry within genome-length  
688 hepatitis C virus RNA. *Virology* **222**:31-42.
- 689 49. **Masaki T, Arend KC, Li Y, Yamane D, McGivern DR, Kato T, Wakita T, Moorman NJ, Lemon**  
690 **SM.** 2015. miR-122 stimulates hepatitis C virus RNA synthesis by altering the balance of viral RNAs  
691 engaged in replication versus translation. *Cell Host Microbe* **17**:217–228.

- 692 50. **Roberts APE, Lewis AP, Jopling CL.** 2011. miR-122 activates hepatitis C virus translation by a  
693 specialized mechanism requiring particular RNA components. *Nucleic Acids Res* **39**:7716–7729.
- 694 51. **Shimakami T, Yamane D, Jangra RK, Kempf BJ, Spaniel C, Barton DJ, Lemon SM.** 2012.  
695 Stabilization of hepatitis C virus RNA by an Ago2-miR-122 complex. *Proc Natl Acad Sci USA*  
696 **109**:941-946.
- 697 52. **Li Y, Masaki T, Shimakami T, Lemon SM.** 2014. hnRNP L and NF90 interact with hepatitis C virus  
698 5'-terminal untranslated RNA and promote efficient replication. *J Virol* **88**:7199-7209.
- 699 53. **Schmidt T, Friedrich S, Golbik RP, Behrens SE.** 2017. NF90-NF45 is a selective RNA chaperone that  
700 rearranges viral and cellular riboswitches: biochemical analysis of a virus host factor activity. *Nucleic*  
701 *Acids Res* **45**:12441-12454.
- 702 54. **Wang L, Jeng KS, Lai MM.** 2011. Poly(C)-binding protein 2 interacts with sequences required for viral  
703 replication in the hepatitis C virus (HCV) 5' untranslated region and directs HCV RNA replication  
704 through circularizing the viral genome. *J Virol* **85**:7954-7964.
- 705 55. **Weinlich S, Hüttelmaier S, Schierhorn A, Behrens SE, Ostareck-Lederer A, Ostareck DH.** 2009.  
706 IGF2BP1 enhances HCV IRES-mediated translation initiation via the 3'UTR. *RNA* **15**:1528-1542.
- 707 56. **DiAugustine RP, Schaefer JM, Fouts JR.** 1973. Hepatic lipid droplets. Isolation, morphology and  
708 composition. *Biochem J* **132**:323–327.
- 709 57. **Khor VK, Shen W-J, Kraemer FB.** 2013. Lipid droplet metabolism. *Curr Opin in Clin Nutr Metab*  
710 *Care* **16**:632–637.
- 711 58. **Bickel PE, Tansey JT, Welte MA.** 2009. PAT proteins, an ancient family of lipid droplet proteins that

- 712 regulate cellular lipid stores. *Biochim Biophys Acta* **1791**:419–440.
- 713 59. **Vogt DA, Camus G, Herker E, Webster BR, Tsou C-L, Greene WC, Yen T-SB, Ott M.** 2013. Lipid  
714 droplet-binding protein TIP47 regulates hepatitis C Virus RNA replication through interaction with the  
715 viral NS5A protein. *PLoS Pathog* **9**:e1003302.
- 716 60. **Boulant S, Douglas MW, Moody L, Budkowska A, Targett-Adams P, McLauchlan J.** 2008.  
717 Hepatitis C virus core protein induces lipid droplet redistribution in a microtubule- and dynein-dependent  
718 manner. *Traffic* **9**:1268–1282.
- 719 61. **Shavinskaya A, Boulant S, Penin F, McLauchlan J, Bartenschlager R.** 2007. The lipid droplet  
720 binding domain of hepatitis C virus core protein is a major determinant for efficient virus assembly. *J Biol*  
721 *Chem* **282**:37158–37169.
- 722 62. **Moriishi K, Mochizuki R, Moriya K, Miyamoto H, Mori Y, Abe T, Murata S, Tanaka K,**  
723 **Miyamura T, Suzuki T, Koike K, Matsuura Y.** 2007. Critical role of PA28gamma in hepatitis C  
724 virus-associated steatogenesis and hepatocarcinogenesis. *Proc Natl Acad Sci USA* **104**:1661–1666.
- 725 63. **Tsutsumi T, Suzuki T, Shimoike T, Suzuki R, Moriya K, Shintani Y, Fujie H, Matsuura Y, Koike**  
726 **K, Miyamura T.** 2002. Interaction of hepatitis C virus core protein with retinoid X receptor alpha  
727 modulates its transcriptional activity. *Hepatology* **35**:937–946.
- 728 64. **Inui M, Manfrin A, Mamidi A, Martello G, Morsut L, Soligo S, Enzo E, Moro S, Polo S, Dupont S,**  
729 **Cordenonsi M, Piccolo S.** 2011. USP15 is a deubiquitylating enzyme for receptor-activated SMADs.  
730 *Nat Cell Biol* **13**:1368–1375.
- 731 65. **Eichhorn PJ, Rodón L, González-Juncà A, Dirac A, Gili M, Martínez-Sáez E, Aura C, Barba I, Peg**

- 732 **V, Prat A, Cuartas I, Jimenez J, García-Dorado D, Sahuquillo J, Bernardis R, Baselga J, Seoane J.**  
733 2012. USP15 stabilizes TGF- $\beta$  receptor I and promotes oncogenesis through the activation of TGF- $\beta$   
734 signaling in glioblastoma. *Nat Med* **18**:429-435.
- 735 66. **Villeneuve NF, Tian W, Wu T, Sun Z, Lau A, Chapman E, Fang D, Zhang DD.** 2013. USP15  
736 Negatively Regulates Nrf2 through Deubiquitination of Keap1. *Mol Cell* **51**:68–79.
- 737 67. **Long L, Thelen JP, Furgason M, Haj-Yahya M, Brik A, Cheng D, Peng J, Yao T.** 2014. The U4/U6  
738 recycling factor SART3 has histone chaperone activity and associates with USP15 to regulate H2B  
739 deubiquitination. *J Biol Chem* **289**:8916–8930.
- 740 68. **Fukagai K, Waku T, Chowdhury AMMA, Kubo K, Matsumoto M, Kato H, Natsume T, Tsuruta F,**  
741 **Chiba T, Taniguchi H, Kobayashi A.** 2016. USP15 stabilizes the transcription factor Nrf1 in the nucleus,  
742 promoting the proteasome gene expression. *Biochem Biophys Res Commun* **478**:363–370.
- 743 69. **Jongsma MLM, Berlin I, Wijdeven RHM, Janssen L, Janssen GMC, Garstka MA, Janssen H,**  
744 **Mensink M, van Veelen PA, Spaapen RM, Neefjes J.** 2016. An ER-Associated Pathway Defines  
745 Endosomal Architecture for Controlled Cargo Transport. *Cell* **166**:152–166.
- 746 70. **Pyeon D, Timani KA, Gulraiz F, He JJ, Park I-W.** 2016. Function of ubiquitin (Ub) specific protease  
747 15 (USP15) in HIV-1 replication and viral protein degradation. *Virus Res* **223**:161–169.
- 748 71. **Su Z-J, Cao J-S, Wu Y-F, Chen W-N, Lin X, Wu Y-L, Lin X.** 2017. Deubiquitylation of hepatitis B  
749 virus X protein (HBx) by ubiquitin- specific peptidase 15 (USP15) increases HBx stability and its  
750 transactivation activity. *Sci Rep* **7**:40246.
- 751 72. **Vos RM, Altreuter J, White EA, Howley PM.** 2009. The Ubiquitin-Specific Peptidase USP15

- 752 Regulates Human Papillomavirus Type 16 E6 Protein Stability. *J Virol* **83**:8885–8892.
- 753 73. **Saito T, Owen DM, Jiang F, Marcotrigiano J, Gale MJ.** 2008. Innate immunity induced by  
754 composition-dependent RIG-I recognition of hepatitis C virus RNA. *Nature* **454**:523–527.
- 755 74. **Kapadia SB, Chisari FV.** 2005. Hepatitis C virus RNA replication is regulated by host  
756 geranylgeranylation and fatty acids. *Proc Natl Acad Sci USA* **102**:2561-2566.
- 757 75. **Chen W, Li X-M, Li A-L, Yang G, Hu H-N.** 2016. Hepatitis C Virus Increases Free Fatty Acids  
758 Absorption and Promotes its Replication Via Down-Regulating GADD45alpha Expression. *Med Sci*  
759 *Monit* **22**:2347–2356.
- 760 76. **Leu G-Z, Lin T-Y, Hsu JTA.** 2004. Anti-HCV activities of selective polyunsaturated fatty acids.  
761 *Biochem Biophys Res Commun* **318**:275–280.
- 762 77. **Huang H, Chen Y, Ye J.** 2007. Inhibition of hepatitis C virus replication by peroxidation of arachidonate  
763 and restoration by vitamin E. *Proc Natl Acad Sci USA* **104**:18666–18670.
- 764 78. **Sun H-Y, Lin C-C, Tsai P-J, Tsai W-J, Lee J-C, Tsao C-W, Cheng P-N, Wu I-C, Chiu Y-C, Chang**  
765 **T-T, Young K-C.** 2017. Lipoprotein lipase liberates free fatty acids to inhibit HCV infection and prevent  
766 hepatic lipid accumulation. *Cell Microbiol* **19**:e12673.
- 767 79. **Lohmann V, Korner F, Koch J, Herian U, Theilmann L, Bartenschlager R.** 1999. Replication of  
768 subgenomic hepatitis C virus RNAs in a hepatoma cell line. *Science* **285**:110–113.
- 769 80. **Russell RS, Meunier J-C, Takikawa S, Faulk K, Engle RE, Bukh J, Purcell RH, Emerson SU.** 2008.  
770 Advantages of a single-cycle production assay to study cell culture-adaptive mutations of hepatitis C  
771 virus. *Proc Natl Acad Sci USA* **105**:4370–4375.
- 772 81. **Katoh H, Mori Y, Kambara H, Abe T, Fukuhara T, Morita E, Moriishi K, Kamitani W, Matsuura**

- 773 Y. 2011. Heterogeneous nuclear ribonucleoprotein A2 participates in the replication of Japanese  
774 encephalitis virus through an interaction with viral proteins and RNA. *J Virol* **85**:10976–10988.
- 775 82. **Okamoto K, Mori Y, Komoda Y, Okamoto T, Okochi M, Takeda M, Suzuki T, Moriishi K,**  
776 **Matsuura Y.** 2008. Intramembrane processing by signal peptide peptidase regulates the membrane  
777 localization of hepatitis C virus core protein and viral propagation. *J Virol* **82**:8349–8361.
- 778 83. **Huang DC, Cory S, Strasser A.** 1997. Bcl-2, Bcl-XL and adenovirus protein E1B19kD are functionally  
779 equivalent in their ability to inhibit cell death. *Oncogene* **14**:405–414.
- 780 84. **Niwa H, Yamamura K, Miyazaki J.** 1991. Efficient selection for high-expression transfectants with a  
781 novel eukaryotic vector. *Gene* **108**:193–199.
- 782 85. **Mashiko D, Fujihara Y, Satouh Y, Miyata H, Isotani A, Ikawa M.** 2013. Generation of mutant mice  
783 by pronuclear injection of circular plasmid expressing Cas9 and single guided RNA. *Sci Rep* **3**:3355.  
784  
785  
786



**Table. 1. Primer set list for real-time PCR**

| Gene   | Forward primer (5' to 3')<br>Reverse primer (5' to 3') | Gene         | Forward primer (5' to 3')<br>Reverse primer (5' to 3') |
|--------|--------------------------------------------------------|--------------|--------------------------------------------------------|
| USP1   | AGTAATGGACTTCAAGAGGTAGC<br>GTTTATAGGTGAAGACTGTGCTG     | USP44        | CAAACCACTTGTACTCACAG<br>CATGAACACCAATCTTCTCTC          |
| USPL1  | CACTTTGTAGAGGCTTACC<br>GTCATCACATCCAGCCAA              | USP46        | AGAAACACTGTGTAGTGAAC<br>CCATGTACTTGAACCGCTTATG         |
| USP2   | ATTCTAAGAGTGCCAGGGTC<br>GAGGGCTGTGTGTCATTG             | USP49        | CCAAATTCACAGAGACAGAG<br>GAACCTGAGGTAGTCTGTAG           |
| USP4   | CAAGCAGTGAAGAAGTATGTGG<br>CACAGCCGTACCAGTTAGTAG        | USP53        | AGATGAGCAGCGATTTCAC<br>CATACAGAGTCATAGCAAAC            |
| USP5   | GGTCCACAAAGACGAGTGC<br>GCTGGCCGCTTATTGAAAT             | USP54        | TACAGTGCAGAGAAATTACG<br>GTTTCCAAAGGCTTCTCTAC           |
| USP6   | GAATGTTACCCCTAACTACCAATG<br>CATATAGGTCTTCTTCCGGGTAT    | ATXN3        | AATTCTCTTGTGCGGGTCC<br>CTGTTGGACCCTAATCATCTGC          |
| USP6NL | ACAAAGGAATACCACTCCAGC<br>CTGTCTCTAAACATAATGTGGTCCC     | BAP1         | AGAGAAGGCCCAACAATAC<br>GATGTTCTGTCCACTAGGTTG           |
| USP7   | CAGATGACCACCAAGAATTAC<br>CATGGCAGATTTCCGACAAA          | CYLD         | AGTTTCTTTGAAGGTTGGAG<br>CACTCCATCAAATCTTCCATCC         |
| USP8   | TCTCAGTGTTCCTGAAGAAGC<br>CTAAACCAGTCAAGAAGTACCACA      | UFD1L        | TGATGCAGAACTACTCTTGG<br>GACAGGCAAAGTCTCTAAGTG          |
| USP9x  | GCAACTTACATGGAAAGCATGAG<br>GGAAGTTAAGCCGTTCTGAAC       | UCHL1        | TGGAAGAGGAGTCTCTGG<br>CTAACTTCTGTCCCTCAGCTC            |
| USP10  | AGTGAACAGTCTGTGTGG<br>GTGCTTGAATACTGTAGCTGGG           | UCHL3        | CTGGAGGAATCTGTGTCAATG<br>CTCAGCTGACCTTCATGGG           |
| USP11  | CGGTGACTGAGGATAGAGAG<br>CTTATACCAGTGTCTTCCAC           | UCHL5        | ATCAAGATGATTGGATCAGTGC<br>GTAACCTGCTATCTTCTGTCTC       |
| USP12  | AAGAGTGTGCGACAAACAG<br>GTACATTTCTGTCTGGATTGGTGG        | JOSD1        | ATAACGCTTCCAGGACAGC<br>CCATAATGACATTCACATCG            |
| USP13  | TCTCAGGCCAGTATTCAAAGC<br>CTCTACTAGATTCCAGGTTGC         | JOSD2        | AGCAGCAGCTCTTTAGCCAG<br>CATTGACATCATAGTTGCCG           |
| USP14  | ATGGAGTTACCATGTGGATTGAC<br>CTGCGCTGAAGCCATTTT          | MYSM1        | ATTGGGATGATGTTAGTC<br>GGTTCTTCTAACATCTGCTG             |
| USP15  | ATCCTGGACCCATTGATAACTCTG<br>CCTTCCATCAATGTGTACCAGC     | OTUB1        | TTAACTGTCTGGCCTATGATG<br>GCATACTCCTTGTATAGGAC          |
| USP16  | AGTGATATTCCTTCTGGAAC<br>CTTCAGGGTGGTCAATAGTAC          | OTUB2        | ATCCATTCTTCGGGACCATC<br>CCTGTAGAAGCAGTTCCCATC          |
| USP18  | GAGGCAAATCTGTGAGTCCATC<br>GCAGGTCTGTCCAATGTTGT         | OTUD4        | TCTAGTCATTCTCAGGGTC<br>CTCAACTCTTTCACGATCAG            |
| USP19  | CTCTCAGAGTGTTCATGTGAAGC<br>CTTAGCCAACTCTGAGGATAGCA     | OTUD5        | CAGTGGTGAATCCTAACAAG<br>CTAGCATCTGCTGTCAATC            |
| USP20  | TTGGTCAACCCAATGTTCC<br>GTTTCTCATCCGTGTCACTCG           | PAN2         | TTGACTTGCACGAGGAGATG<br>GACTTGAAGGATGAGTAGCG           |
| USP21  | TGTTACGATACCGACAGAG<br>GAAGGCCAACATGACCAGAG            | SENP3        | TCTTCAATAAGGAGCTACTG<br>CTCTGCCTGTAGATACTTGG           |
| USP25  | GAGGAGACAACCTACTACCAAACAG<br>CCTGAATGCCCTGTTGATTTC     | SENP5        | AACAAACTATCGGGCCAGAC<br>GACTGCATCCATTATCAGCTC          |
| USP26  | GTGTAAGCTATAATCGAGAG<br>GTCATCTAGGTAAGGATTTC           | SENP6        | TACTCCTCCTATCTCTCTG<br>GGTCCAGTAGACTCATTCAAAG          |
| USP28  | AAACGGTTATCGCAACTTAGACG<br>CACTGGAGGTAGCTTTGTAAACC     | SENP7        | ATGTTCAATCACCCTGTCC<br>GGAAGTAACAGGACACCCCTC           |
| USP29  | CTGAGCAACAACATTAGAAG<br>CTGTTTACATCTCTGTAGG            | SENP8        | GGATGTACGTGATATGTAAC<br>CCTCTCTTTGTGATGTATG            |
| USP31  | TGGAGATGACTGGAGAAAGG<br>CTTAGCAGACAGGACCATGA           | VCPIP1       | GTATCTAAGGAACTTCAGG<br>CTGTAGAATACACCACCT              |
| USP32  | GGGTTAAGACCAGCTACTCC<br>CACTGCATGGAGATGATAAACC         | YOD1         | GAAGACTTGCCCATCCAATC<br>GCAAAGTTTCCCTGACGTAAC          |
| USP33  | GTCTACACCACAGATCCTTCC<br>CTTCTGTATTTCTGTGCTG           | SREBP2       | AGGAGAACATGGTGTGA<br>TAAAGGAGAGGCACAGGA                |
| USP34  | TTTGATTCTGCTCAACTGTC<br>CCTCTGGTTCCATGCGTTTG           | GAPDH        | TGTAGTTGAGGTCATGAAGGG<br>ACATCGCTCAGACACCATG           |
| USP37  | ACTGGCTCAGAATTGAATGAAG<br>CTTCTGACTGTTTCAAATCTC        | Ifn $\alpha$ | AGCCTTGACACTCCTGGTACAAATG<br>TGGGTCAGCTCACTCAGGACA     |
| USP38  | CCTCTTCAGATGATTACAGTTC<br>GAGTGCAATTACCCATGTATCC       | Cxcl10       | ACACCAGCCTGGCTCCATC<br>TTGGAGCTGGAGCTGCTTATAGTTG       |
| USP39  | GGACTTTGACTTTGAGAAAC<br>GTAGGCGTGAGACTTCAAAC           | Il6          | CCACTTCACAAGTCGGAGGCTTA<br>GCAAGTGCATCATCGTTGTTTCATAC  |
| USP40  | ATCAGGACCAGCAACTGTAC<br>GTAGAGGAGAGAACTTGCGC           | Actin        | TTGCTGACAGGATGCAGAAG<br>GTACTTGGCTCAGGAGGAG            |
| USP42  | CAATGCAAGCACATATTACC<br>GCATAGCATCAACAGTGTATTG         |              |                                                        |

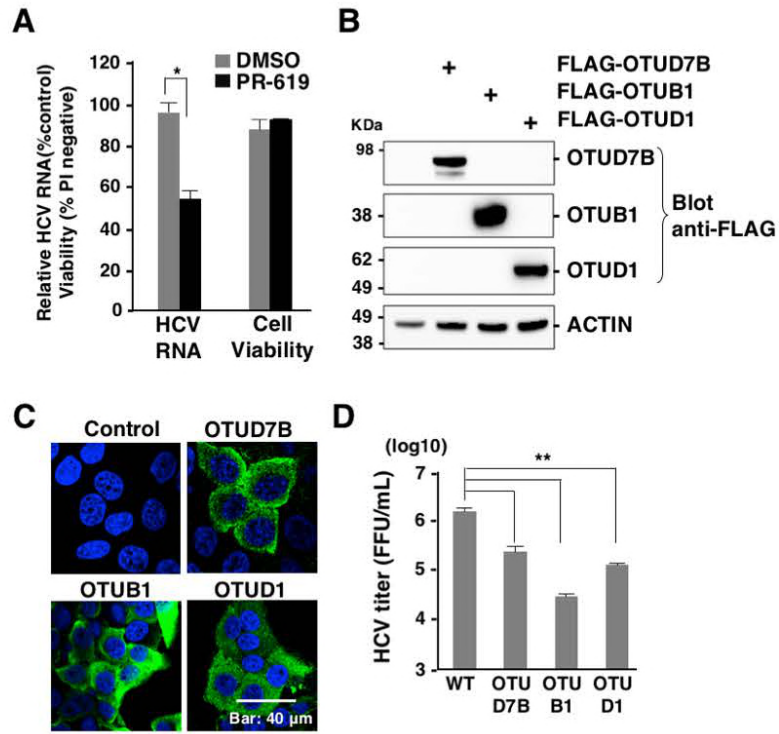

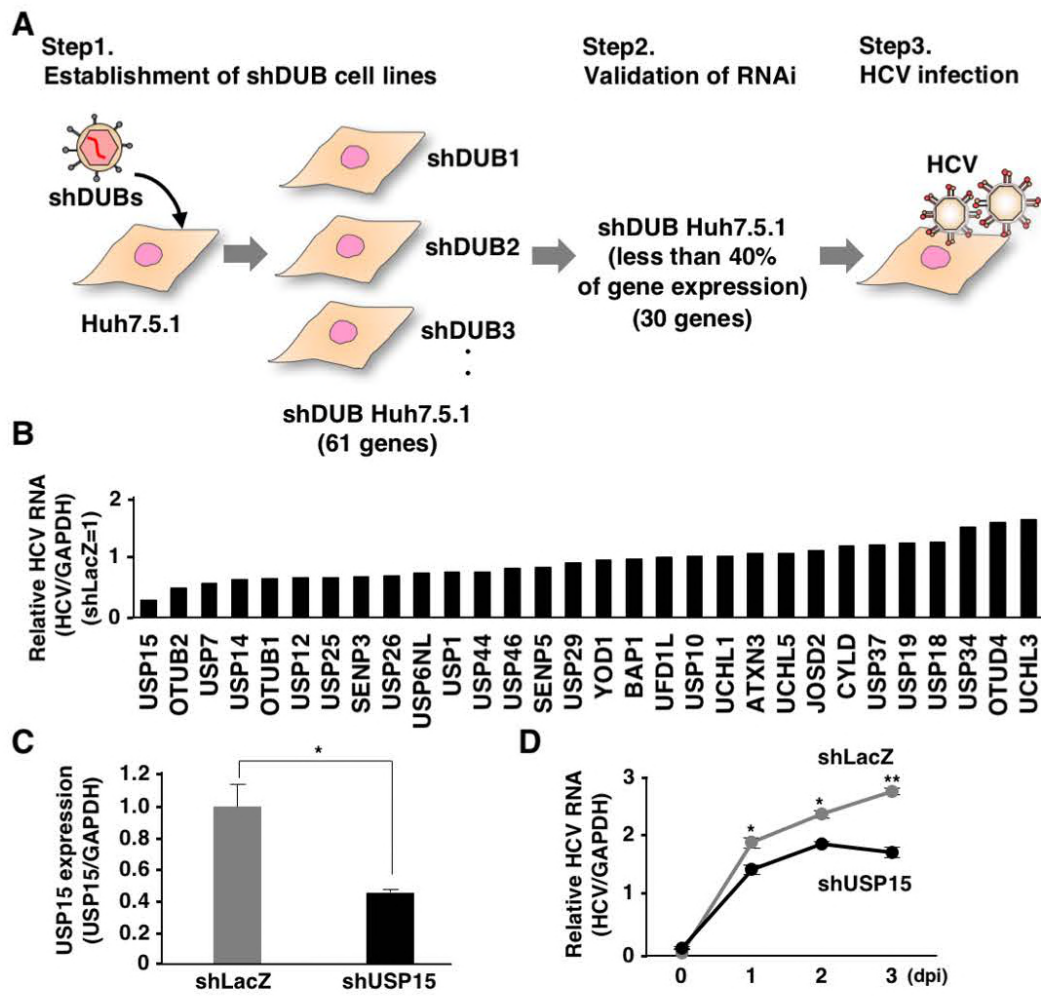

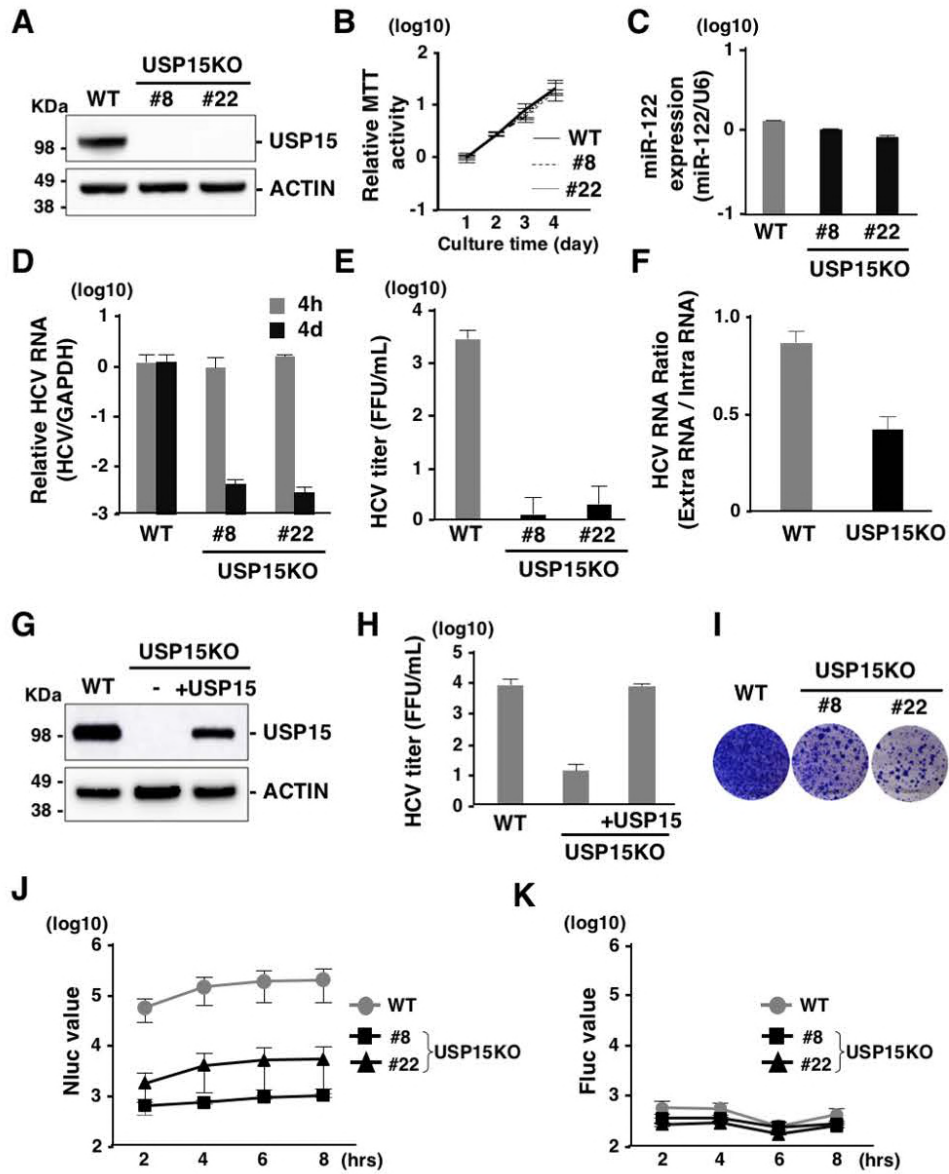

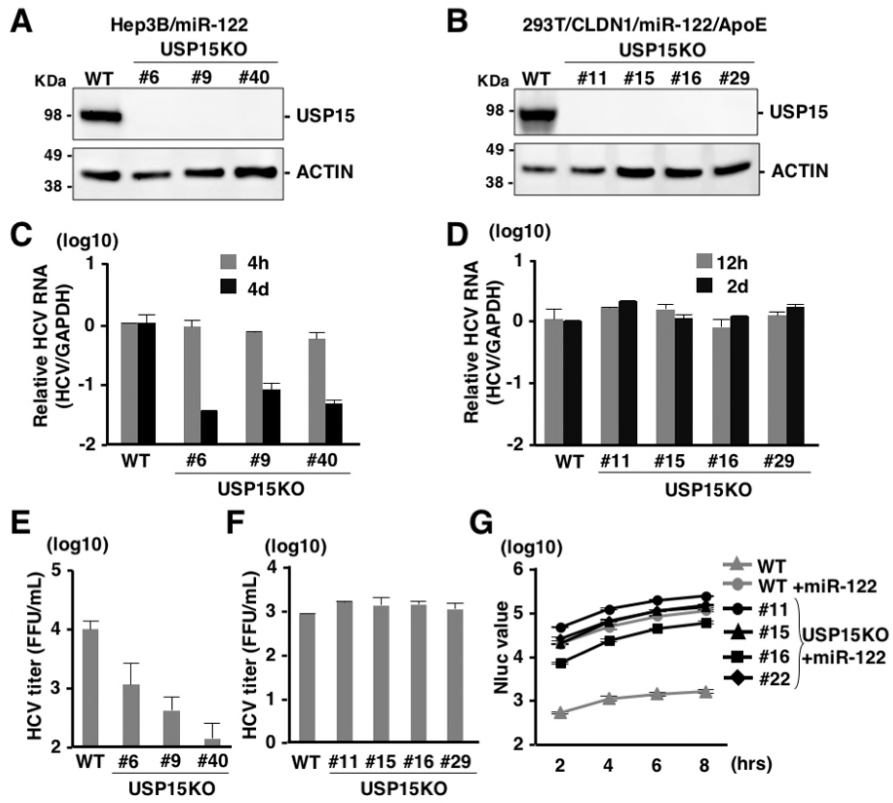

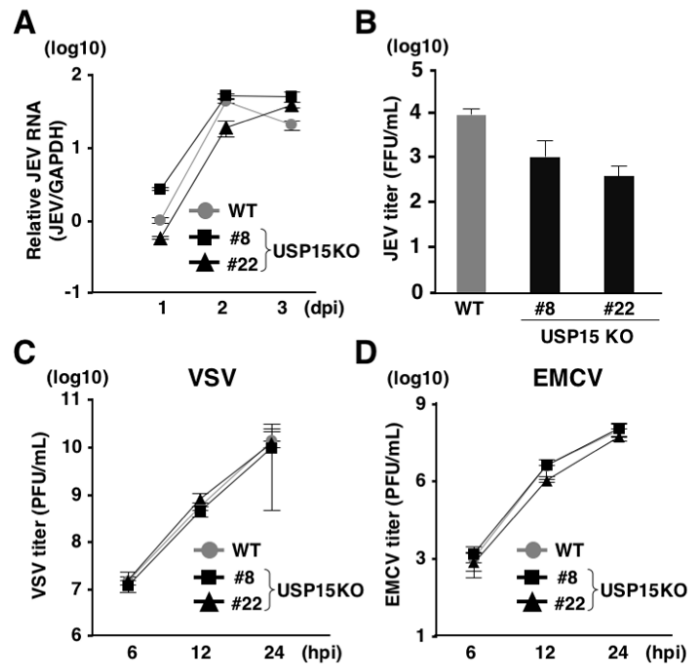

**A**

gtacagacctgccggggggcgGGCCGGGGACGCCATTCCCACAATGCTCCGGGGCGTGCCGCCGCC  
 GTCGCCGCCGCTCCGCTACGGCTAGTGGGAAGAAGATGGCGGAAGCGGAGCGCGGACCTGGACACC  
 CAGCGTTCTGACATCGCGACGCTGCTCAAACCTCGCTCCGGAAAGGGGACACCTGtagggaaacggg  
 gtcgcggggcccgcggggggcccaggctggcggagagctggcgggagcggtgggtgtcgccgg  
 ctggtgacaggtcgggacaggtccggcggcgccgctcaggcagcagattttgggggcaaaggttgga  
 ccggcgcagagggccggggctcgcggggggcgtgcgcgcccgggctgcgcggaagcggcggccggg

**B**

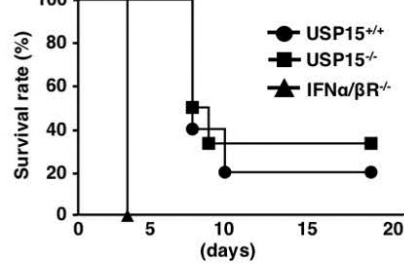

**C**

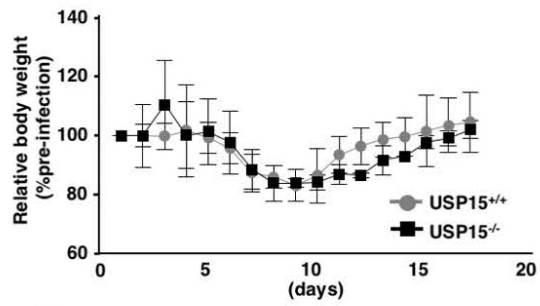

**D**

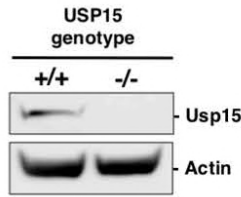

**E**

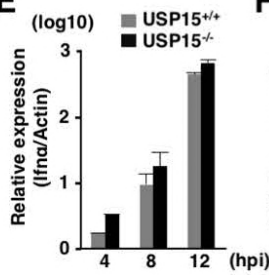

**F**

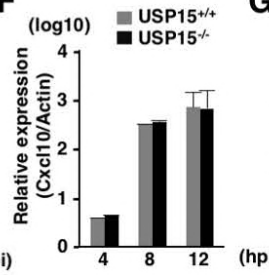

**G**

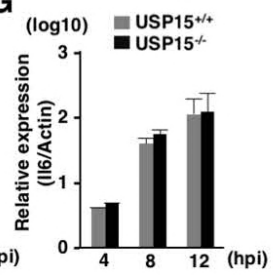

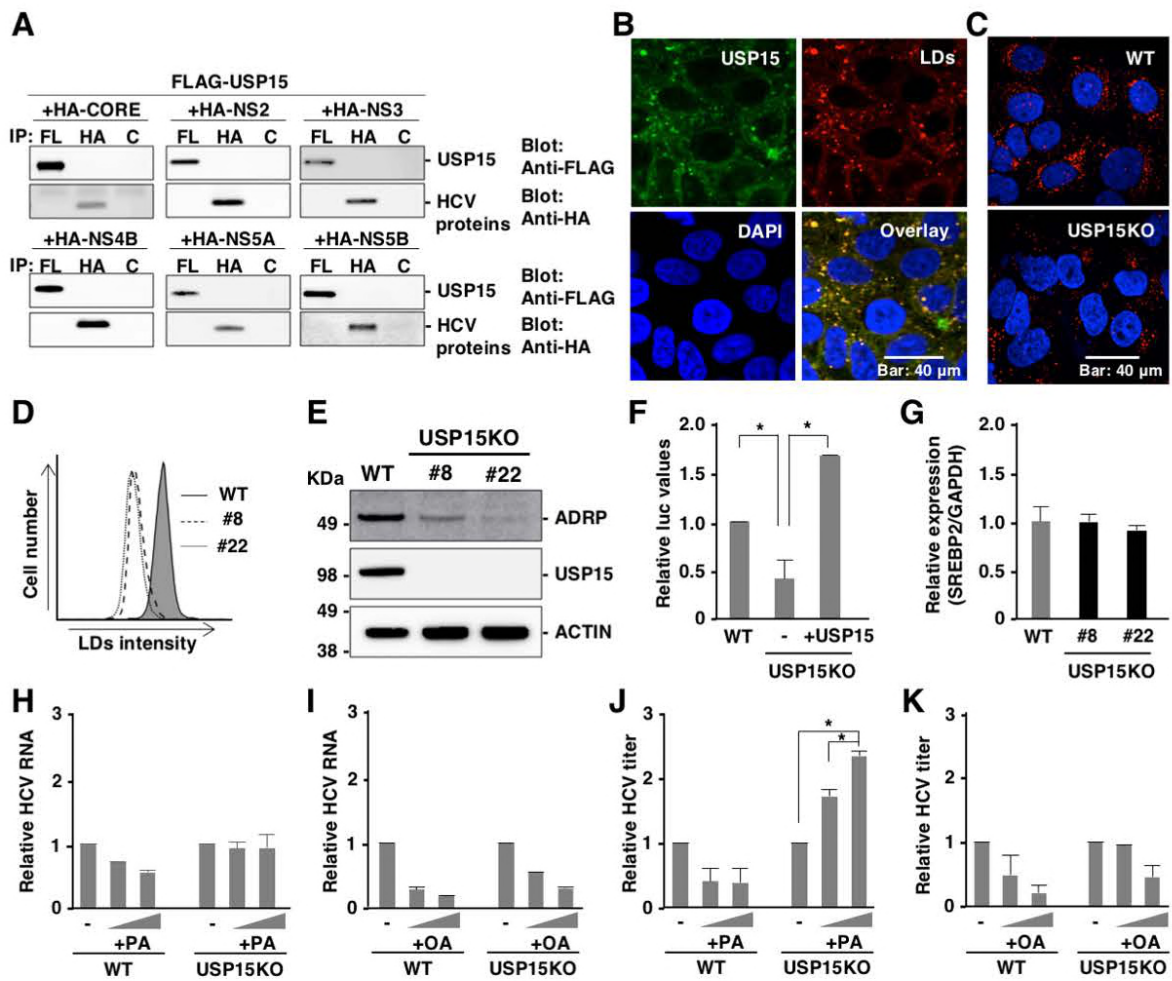

Source: http://biorxiv.org/content/10.1101/432930v1.full.pdf
